1 **Sex differences in cardio-pulmonary pathology of SARS-CoV2 infected and *Trypanosoma cruzi* co-**  
2 **infected mice**

3

4 Dhanya Dhanyalayam<sup>1,\$</sup>, Kezia Lizardo<sup>1,\$</sup>, Neelam Oswal<sup>1</sup>, Hariprasad Thangavel<sup>1</sup>, Enriko Dolgov<sup>1</sup>,  
5 David S. Perlin<sup>1</sup>, Jyothi F. Nagajyothi<sup>1,#</sup>

6 <sup>1</sup>Center for Discovery and Innovation, Hackensack University Medical Center, Nutley, NJ 07110, USA

7 <sup>\$</sup>Authors contributed equally

8

9

10 #Corresponding Author

11 Jyothi F. Nagajyothi

12 Director/Member

13 Center for Discovery and Innovation

14 Hackensack University Medical Center

15 Nutley, NJ 07110, USA

16 Email: [Jyothi.Nagajyothi@HMH-CDI.org](mailto:Jyothi.Nagajyothi@HMH-CDI.org)

17 Phone: 1-201-880-3560

18

19

20

21

22 **ABSTRACT**

23 **Background:** Coronavirus disease-2019 (COVID-19) caused by Severe Acute Respiratory Syndrome  
24 Coronavirus 2 (SARS-CoV-2; CoV2) is a deadly contagious infectious disease. For those who survived  
25 COVID-19, post-COVID cardiac damage poses a major threat for the progression of cardiomyopathy and  
26 heart failure. Currently, the number of COVID-related cases and deaths are increasing in Latin America,  
27 where a major COVID comorbidity is Chagas' heart disease (caused by the parasite *Trypanosoma cruzi*).  
28 Here, we investigated the effect of *T. cruzi* infection on the pathogenesis and severity of CoV2 infection  
29 and, conversely, the effect of CoV2 infection on heart pathology during coinfection.

30 **Methodology/findings:** We used transgenic human angiotensin-converting enzyme 2 (huACE2) mice  
31 infected with CoV2, *T. cruzi*, or coinfecting with both in this study. Our study shows for the first time that  
32 white adipose tissue (WAT) serves as a reservoir for CoV2 and the persistence of CoV2 in WAT alters  
33 adipose tissue morphology and adipocyte physiology. Our data demonstrate a correlation between the loss  
34 of fat cells and the pulmonary adipogenic signaling (via adiponectin isomers) and pathology in CoV2  
35 infection. The viral load in the lungs is inversely proportional to the viral load in WAT, which differs  
36 between male and female mice. Our findings also suggest that adiponectin-PPAR signaling may  
37 differently regulate Chagas cardiomyopathy in coinfecting males and females.

38 **Conclusion:** We conclude that adipogenic signaling may play important roles in cardio-pulmonary  
39 pathogenesis during CoV2 infection and *T. cruzi* coinfection. The levels of adiponectin isomers differ  
40 between male and female mice during CoV2 infection and coinfection with *T. cruzi*, which may  
41 differently regulate inflammation, viral load, and pathology in the lungs of both the sexes. Our findings  
42 are in line with other clinical observations that reported that males are more susceptible to COVID-19  
43 than females and suffer greater pulmonary damage.

44

45 **Key words:** Chagas heart disease, CoV2 infection, pulmonary pathology, adipocytes, inflammation,  
46 cardiomyopathy, adiponectin

47

## 48 INTRODUCTION

49 COVID-19 illness, caused by severe acute respiratory syndrome coronavirus 2 (SARS-CoV-2; CoV2),  
50 results in debilitating disease manifestations in many infected people and increases mortality in people  
51 with comorbidities including heart diseases [1-6]. The causes of death in COVID-19 patients include  
52 cardiomyopathy, stroke, cardiac arrest, sepsis, and organ failure [7-10]. Post-COVID patients exhibit  
53 various degrees of cardiac damage, which may cause debilitating long-term effects on heart function [11-  
54 13]. Thus, the post-COVID effect may pose a major threat for the progression of cardiomyopathy and  
55 developing heart failure in patients with pre-existing heart conditions.

56 Although currently deaths due to COVID-19 are subsiding in many countries due to vaccination, the  
57 number of cases and deaths are still increasing in Latin America [14], where a major COVID-19  
58 comorbidity is Chagas Disease (CD). CD is caused by the parasite *Trypanosoma cruzi*, which infects an  
59 estimated eight million people in Latin America and is also increasingly found in non-endemic countries,  
60 including 300,000 infected individuals in the United States [15]. Of these chronically infected individuals,  
61 30% will develop chronic Chagas cardiomyopathy (CCM) and congestive heart failure, which are  
62 significant causes of morbidity and mortality [16]. Thus, vulnerable COVID-19 patients with CD are a  
63 major health burden in the Americas. In addition, the post-COVID effect on CCM in CD patients could  
64 create a health crisis in Latin America during the post-COVID era since hundreds of thousands of  
65 asymptomatic (indeterminate) CD patients likely already have or will contract COVID-19. Yet, there is  
66 virtually no clinical data or information from animal models on the interplay between CD and COVID  
67 susceptibility, severity, risk of mortality, and long-term effects on heart pathology in post-COVID CD  
68 patients.

69 Recent clinical meta-analysis data for COVID-19 suggest that male sex is independently associated with  
70 hospitalization, ICU admissions, need for vasopressors or endotracheal intubation and mortality [17].

71 Many clinical studies have also reported that male gender has been associated with a higher mortality rate  
72 due to Chagas' heart disease [18, 19]. Male CD patients are at higher risk myocardial fibrosis and worse  
73 ventricular remodeling [19]. However, the role of sex difference in the interactions between COVID and  
74 CD is unknown.

75 In the present (preliminary) study, we have investigated the effect of indeterminate stage *T. cruzi*  
76 infection on the pathogenesis and severity of CoV2 infection and, conversely, the effect of CoV2  
77 infection on heart metabolism and pathogenesis using huACE2 mice infected with CoV2, *T. cruzi*, or  
78 coinfecting with both. Our results show that adipose tissue and adipogenesis play important roles in  
79 cardio-pulmonary pathogenesis during CoV2 infection and *T. cruzi* coinfection. We also demonstrate that  
80 adipogenic factors are likely responsible for (i) the observed sex-dependent susceptibility to pulmonary  
81 pathology and severity during CoV2 infection, and (ii) the pathogenesis of post-COVID cardiomyopathy  
82 or progression of post-COVID CCM in CoV2 infection or coinfection, respectively.

83

## 84 **MATERIALS AND METHODS**

### 85 **Biosafety**

86 All aspects of this study were approved by the Institutional Animal Care and Use and Institutional  
87 Biosafety Committee of Center for Discovery and Innovation of Hackensack University Medical Centre  
88 (IACUC 282) and adhere to the National Research Council guidelines.

### 89 **Animal model and experimental design**

90 The transgenic mice expressing the human angiotensin-converting enzyme 2 (huACE2) (Jackson  
91 Laboratories, Bar Harbor, ME) were bred at Hackensack Meridian Health - Center for Discovery and  
92 Innovation (CDI). The Brazil strain of *T. cruzi* was maintained by passage in C3H/HeJ mice (Jackson  
93 Laboratories, Bar Harbor, ME). Both male and female mice (N=16) were intraperitoneally (i.p.) infected  
94 with  $10^3$  trypomastigotes at 6 weeks of age. Mice were maintained on a 12-hour light/dark cycles and

95 housed in groups of 3-5 per cage with unlimited access to water and chow. Once they reached  
96 indeterminate stage [20] (65 DPI; no circulating parasitemia and pro-inflammatory markers), one set of  
97 mice was coinfecting intra-nasally with  $1 \times 10^4$  pfu SARS-CoV2 (NR-52281, Isolate USA-WA1/2020  
98 COV-2 virus, NIH-BEI resources). After 10 DPI CoV2 (i.e. 75 DPI *T. cruzi* infection), we collected  
99 samples (heart, lungs, white adipose tissue (WAT) and blood; n=4/sex/subset). Age and sex matched  
100 huACE2 mice infected with SARS-CoV2 alone, as well as uninfected huACE2 mice, served as controls  
101 (Supplemental Fig. 1).

## 102 **Immunoblot analysis**

103 Tissue lysates were prepared as previously described [20]. Each sample containing 30  $\mu$ g of protein were  
104 resolved on SDS-PAGE and separately on native gel electrophoresis and the proteins were transferred to  
105 nitrocellulose membrane for immunoblot analysis. Adiponectin-specific mouse monoclonal antibody  
106 (#ab22554, Abcam), AdipoR1-specific rabbit polyclonal antibody (#ab70362, Abcam), AdipoR2-specific  
107 rabbit polyclonal antibody (#ABT12, Sigma-Aldrich), PPAR $\alpha$ -specific rabbit polyclonal antibody (#PA1-  
108 822A, Thermo Fisher Scientific), PPAR $\gamma$ -specific rabbit polyclonal antibody (#2492, Cell Signaling  
109 Technology), pAMPK-specific rabbit monoclonal antibody (#2535S, Cell Signaling Technology),  
110 Cytochrome C-specific rabbit monoclonal antibody (#4280S, Cell Signaling Technology), Superoxide  
111 dismutase 1-specific mouse monoclonal antibody (#4266S, Cell Signaling Technology), Hexokinase 2-  
112 specific rabbit monoclonal antibody (#2867S, Cell Signaling Technology),  $\beta$ 1 adrenergic receptor-  
113 specific rabbit polyclonal antibody (#12271S, Cell Signaling Technology), F4/80-specific rat monoclonal  
114 antibody (#NB 600-404, Novus Biologicals), TNF $\alpha$ -specific rabbit polyclonal antibody (#ab6671,  
115 Abcam), pHSL (Ser563)-specific rabbit monoclonal antibody(#4139, Cell Signaling Technology),  
116 ATGL-specific rabbit monoclonal antibody(#30A4, Cell Signaling Technology, Perilipin-specific rabbit  
117 monoclonal antibody (#D1D8, Cell Signaling Technology), IFN $\gamma$ -specific rabbit monoclonal antibody  
118 (#EPR1108, Abcam), CD4-specific rabbit polyclonal antibody (#NBP1-19371, Novus biologicals), CD8-  
119 specific rabbit polyclonal antibody(#NBP2-29475, Novus biologicals), T-cadherin-specific rabbit

120 polyclonal antibody (#ABT121, Millipore), FABP4-specific rabbit monoclonal antibody (#3544, Cell  
121 Signaling Technology), IL6-specific mouse monoclonal antibody (#66146-1-Ig, Proteintech), IL10-  
122 specific rabbit polyclonal antibody (#20850-1-AP, Proteintech), BNIP3-specific rabbit monoclonal  
123 antibody (#44060, Cell Signaling Technology), Caspase 3-specific rabbit polyclonal antibody (#9662,  
124 Cell Signaling Technology) were used as primary antibodies. Horseradish peroxidase (HRP)-conjugated  
125 anti-mouse immunoglobulin (#7076, Cell Signaling Technology) or HRP-conjugated anti-rabbit  
126 immunoglobulin (#7074, Cell Signaling Technology) antibody was used to detect specific protein bands  
127 (as shown in the figure legends) using a chemiluminescence system.  $\beta$ -actin-specific rabbit monoclonal  
128 antibody (#4970S, Cell Signaling Technology) or Guanosine nucleotide dissociation inhibitor (GDI)  
129 (#71-0300, Invitrogen) were used as protein loading controls.

### 130 **Determination of parasite load in the tissue**

131 After appropriate infection, organs such as heart, lungs and WAT were collected from the mice and stored  
132 at  $-80^{\circ}$  C. A quantitative real time polymerase chain reaction (q-RT-PCR) was used to quantify the  
133 parasite load by using PCR SYBER Green Master Mix (Roche, Applied Science, CT) containing  $MgCl_2$   
134 by employing QuantStudio 3 Real-Time PCR system (Thermo Fisher). DNA isolation, preparation of  
135 standard curve and qPCR analysis was performed as previously published [21].

### 136 **Determination of SARS-CoV-2 load in the tissue**

137 Total RNA was isolated from lungs, heart and WAT by Trizol reagent. The number of SARS-COV-2  
138 copies were quantified using Direct One-Step RT-qPCR Mix for SARS-CoV-2 kit (Takara Bio Inc.).

### 139 **Histological analysis**

140 Heart, lung, and WAT tissues were harvested and fixed with neutral buffered formalin overnight and  
141 embedded in paraffin wax. Hematoxylin and eosin (H&E) and Masson's trichrome staining were  
142 performed, and the images were captured and analyzed as previously described [22]. Four to six images  
143 per section of heart or lungs were compared in each group. Histological evidence of pathology in the

144 lungs was classified in terms of the presence of infiltrated immune cells, lipid droplets and foamy  
145 macrophages and was graded on a 6-point scale ranging from 0 to 5.

### 146 **Morphometric analysis of the heart**

147 The hearts were harvested immediately after sacrificing the mice. The hearts were cut 5mm above the  
148 apex in cross section through the ventricles, fixed in formaldehyde, analyzed by histological staining as  
149 described earlier [23]. Briefly, the H&E sections of the hearts were used to analyze the thickness of the  
150 left ventricular wall (LVW), right ventricular wall (RVW) and the intra-septal wall [23]. The thickness of  
151 the LVW, RVW and septal wall was measured at five different locations at a magnification of 10x [23].  
152 The average value of the 5 measurements was calculated for each mouse.

### 153 **Statistical Analysis**

154 Data represent means  $\pm$  S.E. Data were pooled, and statistical analysis was performed using a Student's t-  
155 test (Microsoft Excel) as appropriate and significance differences were determined as p values between  $<$   
156 0.05 and  $<0.001$  as appropriate.

157 **RESULTS:** We obtained the following results using three different murine models of infections, namely,  
158 CoV2 model (infected with SARS-CoV2); *T. cruzi* model (infected with *T. cruzi*), and coinfection model  
159 (infected with *T. cruzi* followed by SARS-CoV2 at 65DPI).

160 ***T. cruzi* infection differently alters ACE2 levels and CoV2 load in the lungs, heart, and adipose**  
161 **tissue in males and females and in CoV2 infected and coinfecting huACE2 mice:** ACE2 is a known  
162 receptor for the cell entry of SARS-CoV2 [24, 25]. We analyzed the effect of *T. cruzi* infection on the  
163 expression levels of ACE2 in the lungs, heart, and white adipose tissue (WAT) by Western blotting (Fig.  
164 1A). CoV2 infection significantly increased ACE2 levels in the lungs in huACE2 mice (Fig. 1A). The  
165 levels of ACE2 were significantly higher in the lungs in both male and female (5- and 3-fold,  
166 respectively) CoV2 infected mice compared to sex matched control mice (Fig. 1A). ACE2 levels  
167 significantly increased (3.5-fold) in the lungs of *T. cruzi* infected mice and were further (2-fold) increased

168 in mice coinfecting with CoV2. We observed no difference in the levels of ACE2 in the lungs between the  
169 sexes in coinfecting mice. In the hearts, in uninfected female mice, the levels of ACE2 were significantly  
170 lower (2.2-fold) compared to uninfected male mice (Fig. 1A). CoV2 infection significantly increased  
171 ACE2 levels in the hearts in male (1.7-fold) and female (2.15-fold) mice, whereas *T. cruzi* infection  
172 significantly decreased ACE2 levels in the hearts in male mice (2.5-fold) (but not in female mice)  
173 compared to sex matched uninfected control mice. However, ACE2 levels in the hearts significantly  
174 increased in coinfecting male and female (3.6-fold and 7.2-fold, respectively) compared to sex matched *T.*  
175 *cruzi* infected mice. In WAT, the levels of ACE2 were significantly higher in both male and female (2-  
176 and 1.5-fold, respectively) CoV2 infected mice compared to sex matched control mice (Fig. 1A). WAT  
177 ACE2 levels also significantly increased (1.5-fold) in *T. cruzi* infected male mice and were further (2-  
178 fold) increased in male mice coinfecting with CoV2 compared to sex matched control mice. In contrast,  
179 we observed no difference in the levels of ACE2 in WAT in *T. cruzi* infected female mice and coinfecting  
180 female mice compared to sex matched control mice (Fig. 1A).

181 Lung viral loads quantitated by qPCR analysis were significantly greater in male CoV2 infected mice  
182 compared to female CoV2 infected mice (Fig. 1B), which may be due to increased ACE2 levels in male  
183 mice. Interestingly, although *T. cruzi* infection increased ACE2 levels in both male and female mice and  
184 in coinfecting mice, the viral load in the lungs of female coinfecting mice was significantly greater  
185 compared to male coinfecting mice (Fig. 1B). However, the viral load in the lungs of coinfecting male mice  
186 were significantly lower (7.5-fold,  $p \leq 0.005$ ) compared to CoV2 infected male mice, whereas the viral  
187 load in the lungs of coinfecting female mice was not significantly altered compared to CoV2 infected  
188 female mice (Fig. 1B). These data suggest that males are likely more susceptible to pulmonary CoV2  
189 infection in general but that females may be more susceptible to pulmonary CoV2 infection in the context  
190 of CD. The-fold changes in heart ACE2 levels were significantly greater in coinfecting mice compared to  
191 CoV2 alone infected mice (Fig. 1A). However, the viral load was significantly lower in the hearts of  
192 coinfecting male and female mice (4.7-fold and 3.6-fold, respectively) compared to CoV2 infected male



193 and female mice (Fig. 1B). qPCR analysis demonstrated significantly higher levels of viral load in  
194 adipose tissue in female CoV2 infected mice (64-fold,  $p \leq 0.005$ ) compared to male CoV2 infected mice  
195 (Fig.1B). The WAT viral load in male coinfecting mice was significantly higher (2-fold,  $p \leq 0.05$ )  
196 compared to female coinfecting mice. The WAT viral load in coinfecting female mice was significantly  
197 lower (23-fold,  $p \leq 0.005$ ) compared to CoV2 infected female mice. However, the viral load in WAT in  
198 coinfecting male mice was significantly higher (6-fold,  $p \leq 0.01$ ) compared to CoV2 infected male mice.  
199 These data demonstrate that: (i) *T. cruzi* infection differently alters ACE2 levels in male and female  
200 animals; (ii) CoV2 infection differently alters ACE2 levels and viral load in male and female mice, and  
201 this difference is even greater in *T. cruzi*-CoV2 coinfection; (iii) SARS-CoV2 infects and persists in  
202 adipose tissue; (iv) adipose tissue in females may act as a sink and reservoir for CoV2; and (v) an inverse  
203 relationship exists in the viral load between the lungs and adipose tissue.

204 **Sex difference in pulmonary pathology during CoV2 infection in *T. cruzi* infected and uninfected**  
205 **mice:** Histological analysis of H&E and Masson's trichrome stained lung sections of control, CoV2  
206 infected, *T. cruzi* infected, and coinfecting mice were analyzed for infiltrated immune cells, accumulated  
207 lipid droplets, fibrosis, and granulomas (Fig. 2A). Histological analysis showed significantly increased  
208 infiltrated immune cells and lipid droplets in the lungs of *T. cruzi* infected mice compared to uninfected  
209 mice (Fig. 2A and 2B). The alveolar space was more constrained and interstitial tissue thickened in male  
210 *T. cruzi* infected mice compared to female *T. cruzi* mice. CoV2 infection also significantly increased  
211 infiltration of immune cells and lipid droplets in the lungs compared to uninfected mice (sex and age  
212 matched). However, the number of granulomas and their size were greater in male CoV2 mice compared  
213 to female CoV2 mice. Interestingly, both the number and size of granulomas were greater in the lungs of  
214 female coinfecting mice than in male coinfecting mice. For both sexes, we observed vascular leakage  
215 (hemosiderin) and neutrophilic alveolitis in the lungs in CoV2/coinfecting mice. These analyses  
216 demonstrated that: (i) The pulmonary pathology in coinfection is reduced compared to CoV2 infection  
217 alone; and (ii) although males are more susceptible to severe pulmonary CoV2 infection in general, in the

218 context of *T. cruzi* coinfection females are more susceptible to severe pulmonary CoV2 infection  
219 compared to males.

220 **CoV2 infection alters adipogenic signaling in the lungs of uninfected and *T. cruzi* infected mice:**

221 Because we observed significantly increased lipid droplets in the lungs in CoV2 and *T. cruzi* infected  
222 mice compared to uninfected mice, we examined and quantified the levels of adipogenic markers such as  
223 adiponectin (ApN) and its receptors in the lungs by Western blotting. We measured the levels of lung  
224 high-molecular weight ApN (L-HMW ApN), a.k.a. its anti-inflammatory/anti-fibrotic/metabolically  
225 active form [26, 27] by native gel, and lung gAd (L-gAd), a.k.a. its pro-inflammatory form [28], by SDS-  
226 Page Western blotting (Fig. 3A). The-fold changes in the levels of HMW and gAd in the lungs in CoV2  
227 and *T. cruzi* infected mice compared to their respective controls are shown in Table 1A. The levels of L-  
228 HMW ApN and gAd significantly increased (1.5- and 14-fold, respectively) in CoV2 infected female  
229 mice compared to uninfected female mice. However, L-HMW ApN was reduced (1.2-fold) in CoV2  
230 infected male mice compared to uninfected male mice. *T. cruzi* infection significantly increased L-HMW  
231 ApN in both males and females (3- and 2-fold, respectively) and gAd (3.8-fold) only in female mice  
232 compared to sex matched uninfected mice. During coinfection, the levels of L-HMW ApN significantly  
233 reduced (3.6- and 2.6-fold, respectively) and gAd significantly increased (6.0- and 2.5-fold, respectively)  
234 in both male and female coinfecting mice compared to sex matched *T. cruzi* infected mice. Our results  
235 suggest that CoV2 infection increases gAd levels in the lungs in *T. cruzi* infected mice.

| Protein Marker | Control Male | CoV2 Male           | <i>T. cruzi</i> Male | Coinfect Male         | Control Female | CoV2 Female          | <i>T. cruzi</i> Female | Coinfect Female       |
|----------------|--------------|---------------------|----------------------|-----------------------|----------------|----------------------|------------------------|-----------------------|
| Perilipin      | 1.0          | 1.26 <sub>↑</sub> * | 1.2 <sub>↑</sub> *   | 1.3 <sub>↑</sub> *    | 1.0            | 1.11                 | 1.18 <sub>↑</sub> *    | 1.25 <sub>↑</sub> *   |
| CD4            | 1.0          | -                   | -                    | 2.0 <sub>↑</sub> **   | 1.0            | 5.4 <sub>↑</sub> **  | 1.3 <sub>↑</sub> **    | 2.5 <sub>↑</sub> **   |
| CD8            | 1.0          | 1.4 <sub>↑</sub> *  | 7.0 <sub>↑</sub> *** | 1.24 <sub>↓</sub> **  | 1.0            | 2.0 <sub>↑</sub> **  | 6.6 <sub>↑</sub> **    | 2.0 <sub>↑</sub> **   |
| F4/80          | 1.0          | 4.3 <sub>↓</sub> ** | 3.4 <sub>↑</sub> *** | 1.7 <sub>↓</sub> **   | 1.0            | 3.6 <sub>↑</sub> **  | 2.3 <sub>↑</sub> **    | 1.2 <sub>↓</sub> *    |
| TNFα           | 1.0          | -                   | 2.3 <sub>↓</sub> **  | 46.0 <sub>↑</sub> *** | 1.0            | 10.2 <sub>↑</sub> ** | 2.0 <sub>↑</sub> **    | 25.0 <sub>↑</sub> *** |
| IFNγ           | 1.0          | 2.0 <sub>↑</sub> ** | -                    | 3.6 <sub>↑</sub> **   | 1.0            | 1.7 <sub>↑</sub> **  | 1.4 <sub>↓</sub> **    | 1.7 <sub>↑</sub> **   |
| HMW ApN        | 1.0          | 1.2 <sub>↓</sub> ** | 3.0 <sub>↑</sub> **  | 3.6 <sub>↑</sub> **   | 1.0            | 1.5 <sub>↑</sub> **  | 2.0 <sub>↑</sub> **    | 2.6 <sub>↓</sub> **   |
| gAd            | 1.0          | -                   | -                    | 6.0 <sub>↑</sub> **   | 1.0            | 14.0 <sub>↑</sub> ** | 3.8 <sub>↑</sub> **    | 2.5 <sub>↑</sub> **   |
| Adipo R1       | 1.0          | 2.6 <sub>↑</sub> ** | 1.3 <sub>↑</sub> **  | 2.2 <sub>↑</sub> **   | 1.0            | 1.5 <sub>↑</sub> **  | 1.6 <sub>↓</sub> **    | 3.0 <sub>↑</sub> **   |
| Adipo R2       | 1.0          | 3.0 <sub>↑</sub> ** | 1.6 <sub>↑</sub> **  | 1.7 <sub>↑</sub> **   | 1.0            | 1.5 <sub>↑</sub> **  | 1.2 <sub>↓</sub> **    | 1.2 <sub>↑</sub> **   |
| PPAR-α         | 1.0          | -                   | 3.7 <sub>↑</sub> **  | 1.7 <sub>↑</sub> **   | 1.0            | 9.2 <sub>↑</sub> **  | 4.7 <sub>↑</sub> **    | 1.7 <sub>↑</sub> **   |
| PPAR-γ         | 1.0          | -                   | 4.2 <sub>↓</sub> **  | 7.3 <sub>↑</sub> **   | 1.0            | 4.0 <sub>↑</sub> **  | 2.3 <sub>↓</sub> **    | 7.4 <sub>↑</sub> **   |

**Table 1A.** The-fold change of the protein markers (adipogenic, immune and metabolic signaling) levels compared to their sex matched control mice are presented in Table 1A analyzed in the lungs. The-fold changes were analyzed by comparing the protein's normalized level (GDI or  $\beta$ -actin) in infected groups (CoV2/*T. cruzi*) to that in uninfected (control) mice, for males and females separately. For the coinfecting mice, since the baseline is *T. cruzi* infection, the-fold change was calculated for coinfecting mice relative to *T. cruzi* infected mice (for males and females separately). The increase and decrease in the comparative-fold change are presented by an upward or downward arrow, respectively (\*  $p \leq 0.05$ , \*\*  $p \leq 0.01$  and \*\*\*  $p \leq 0.001$  represents the significance). N=4/group.

236

237 The regulatory actions of ApN are mainly mediated by its receptors Adiponectin-R1 and -R2 (Adipo R1  
 238 and R2) and T-cadherin. CoV2 infection significantly increased the levels of R1 and R2 in the lungs in  
 239 males (2.6- and 3.0-fold, respectively) and females (1.5- and 1.5-fold, respectively) compared to  
 240 uninfected sex matched mice (Fig. 3B, Table 1A). *T. cruzi* infection significantly increased the levels of  
 241 R1 and R2 in the lungs of males (1.3- and 1.6-fold, respectively) but significantly decreased both in the  
 242 lungs of females (1.6- and 1.2-fold, respectively) compared to uninfected sex matched mice. Although the  
 243 levels of R1 and R2 differed between male and female *T. cruzi* infected mice, R1 and R2 significantly

244 increased in both male and female coinfecting mice (Fig. 3B), suggesting that CoV2 infection increases  
245 the levels of R1 and R2 in the lungs.

246 ApN signaling and adipogenesis is regulated via peroxisome proliferator-activated receptors (PPARs).  
247 We analyzed the levels of PPAR $\gamma$  and PPAR $\alpha$  by immunoblotting analysis (Fig. 3C). CoV2 infection  
248 significantly increased PPAR $\gamma$  and PPAR $\alpha$  (4.0- and 9.2-fold, respectively) in the lungs in female mice  
249 but did not change their levels in male mice compared to sex matched uninfected mice. *T. cruzi* infection  
250 significantly decreased PPAR $\gamma$  but significantly increased PPAR $\alpha$  in both males (4.2- and 3.7-fold,  
251 respectively) and females (2.3- and 4.7-fold respectively) compared to sex matched uninfected mice.  
252 However, coinfection significantly increased PPAR $\gamma$  and PPAR $\alpha$  in the lungs in both males (7.3- and 1.7-  
253 fold, respectively) and females (7.4- and 1.7-fold, respectively) compared to sex matched *T. cruzi* infected  
254 mice. These data suggest that CoV2 infection induces adipogenic signaling in the lungs of female mice  
255 and male and female *T. cruzi* infected (coinfecting) mice via increased PPAR $\gamma$  signaling.

256 **Immune signaling in the lungs differs between CoV2 infected and coinfecting mice:** Immunoblot  
257 analysis of lung lysates demonstrated significant differences in the levels of lung immune cell (CD4,  
258 CD8, and macrophage marker F4/80) and proinflammatory markers (TNF $\alpha$  and IFN $\gamma$ ) between the sexes  
259 and infections (Fig. 3D). The changes in the normalized protein levels of CD4, CD8 and F4/80  
260 (normalized to GDI levels) are presented as a bar graph (Fig. 3D), and the relative fold change and  
261 significance are shown in Table 1A. These data showed that CoV2 infection increased CD4, CD8 and  
262 F4/80 in the lungs of female mice but increased only CD8 in male mice. *T. cruzi* infection increased CD8  
263 and F4/80 levels in the lungs of both male and female mice and increased CD4 only in female mice. The  
264 coinfection significantly increased only CD4 levels in both male and female coinfecting mice, whereas the  
265 levels of CD8 and F4/80 significantly decreased in both male and female coinfecting mice compared to  
266 sex matched *T. cruzi* infected mice (although the levels of CD8 and F4/80 were higher compared to mice  
267 infected with only CoV2) (Fig. 3D).

268 The levels of proinflammatory TNF $\alpha$  and IFN $\gamma$  significantly increased in the lungs in female CoV2  
269 infected mice, with only IFN $\gamma$  increasing in male CoV2 infected mice compared to sex matched  
270 uninfected mice (Table 1A). *T. cruzi* infection increased TNF $\alpha$  only in female mice. However, both TNF $\alpha$   
271 and IFN $\gamma$  significantly increased in male (46-fold and 3.6-fold;  $p \leq 0.005$  and  $\leq 0.01$ , respectively) and  
272 female (25-fold and 1.7-fold;  $p \leq 0.005$  and  $\leq 0.01$ , respectively) coinfecting mice compared to sex matched  
273 *T. cruzi* infected mice (Table 1A). Our data suggest that proinflammatory TNF $\alpha$  is significantly higher in  
274 the lungs of female CoV2 mice and male coinfecting mice compared to their sex matched  
275 infected/coinfecting groups (Table 1A).

276 **CoV2 infection and Coinfection differently alter adipogenic signaling in WAT in male and female**  
277 **mice:** We analyzed the levels of HMW (multimer) and LMW (trimer) adiponectin in WAT by native  
278 PAGE followed by Western blotting [29]. The levels of adiponectin (multimers and trimers) significantly  
279 increased in female CoV2 infected mice (4-fold and 24-fold, respectively) compared to sex matched  
280 control mice (Fig. 4A). The levels of multimeric adiponectin significantly decreased (2-fold) but trimers  
281 significantly increased (1.7-fold) in male CoV2 infected mice compared to male control mice. In addition,  
282 the adiponectin levels in female CoV2 mice were significantly higher compared to male CoV2 infected  
283 mice (Table 1B). On the contrary, *T. cruzi* infection significantly increased the levels of both multimer  
284 and trimer adiponectin in male mice (2-fold and 14-fold, respectively) and only trimers in female mice (2-  
285 fold) compared to sex matched control mice (Fig. 4A). Interestingly, CoV2 infection in *T. cruzi* infected  
286 mice further increased the levels of both multimer and trimer adiponectin in male mice (1.2- and 3.6-fold,  
287 respectively) and significantly reduced in female mice (2-fold and 4.7-fold) compared to sex matched *T.*  
288 *cruzi* infected mice, which is contrary to the changes in adiponectin levels in males and females in only  
289 CoV2 infected mice compared to control mice.

290 We also analyzed the levels of other adipogenic factors, such as PPAR $\gamma$  and FABP4, in WAT of CoV2  
291 and coinfecting mice (Fig. 4A). Similar to the changes in adiponectin levels, the levels of PPAR $\gamma$  and  
292 FABP4 significantly increased (16.1-fold and 5.4-fold, respectively) in female CoV2 infected mice

293 compared to female control mice and the fold increases were significantly greater in female COV2  
 294 infected mice compared to male CoV2 infected mice. *T. cruzi* infection increased the levels of only  
 295 FABP4 in both male and female mice (1.8- and 3.2-fold, respectively) compared to the respective sex

| Protein Marker (FC) | Control Male | CoV2 Male           | <i>T. cruzi</i> Male | Coinfect Male        | Control Female | CoV2 Female          | <i>T. cruzi</i> Female | Coinfect Female     |
|---------------------|--------------|---------------------|----------------------|----------------------|----------------|----------------------|------------------------|---------------------|
| ACE2                | 1.0          | 2.1 <sup>**</sup>   | 2.1 <sup>**</sup>    | 1.5 <sup>†*</sup>    | 1.0            | 1.5 <sup>†*</sup>    | -                      | -                   |
| HMW ApN             | 1.0          | 2.0 <sup>↓*</sup>   | 1.2 <sup>†</sup>     | 2.0 <sup>†*</sup>    | 1.0            | 4 <sup>***</sup>     | 2.0 <sup>↓*</sup>      | -                   |
| gAd                 | 1.0          | 1.7 <sup>†*</sup>   | 3.6 <sup>†***</sup>  | 14.0 <sup>†***</sup> | 1.0            | 24.0 <sup>†***</sup> | 4.7 <sup>↓***</sup>    | 2.0 <sup>†*</sup>   |
| PPAR-γ              | 1.0          | 2.1 <sup>†***</sup> | 5.3 <sup>†***</sup>  | -                    | 1.0            | 16.1 <sup>†***</sup> | 3.0 <sup>↓*</sup>      | -                   |
| FABP4               | 1.0          | 1.5 <sup>†*</sup>   | 1.9 <sup>†*</sup>    | 1.8 <sup>†*</sup>    | 1.0            | 5.4 <sup>†***</sup>  | 2.5 <sup>↓*</sup>      | 3.2 <sup>†***</sup> |
| CD4                 | 1.0          | 1.6 <sup>†*</sup>   | 1.5 <sup>†*</sup>    | -                    | 1.0            | 6.15 <sup>†***</sup> | -                      | -                   |
| CD8                 | 1.0          | 2.7 <sup>†*</sup>   | 1.9 <sup>†*</sup>    | 2.2 <sup>†***</sup>  | 1.0            | 7.2 <sup>†***</sup>  | -                      | 2.0 <sup>†*</sup>   |
| F4/80               | 1.0          | 3.2 <sup>†***</sup> | 2.4 <sup>†*</sup>    | 1.2 <sup>↓</sup>     | 1.0            | 7.1 <sup>†***</sup>  | 1.7 <sup>†*</sup>      | -                   |
| TNF-α               | 1.0          | -                   | -                    | 2.0 <sup>†*</sup>    | 1.0            | 2.0 <sup>†*</sup>    | 2.0 <sup>↓*</sup>      | 1.7 <sup>↓*</sup>   |
| IL-6                | 1.0          | -                   | -                    | 3.0 <sup>†***</sup>  | 1.0            | -                    | -                      | -                   |
| IL-10               | 1.0          | 1.4 <sup>†</sup>    | 3.3 <sup>†***</sup>  | 3.0 <sup>↓***</sup>  | 1.0            | 2.0 <sup>†*</sup>    | -                      | 1.8 <sup>↓*</sup>   |
| ATGL                | 1.0          | -                   | -                    | -                    | 1.0            | -                    | 2.1 <sup>†*</sup>      | 1.5 <sup>†*</sup>   |
| pHSL                | 1.0          | -                   | -                    | 3 <sup>†*</sup>      | 1.0            | -                    | -                      | -                   |
| BNIP3               | 1.0          | 1.7 <sup>†*</sup>   | 1.4 <sup>†*</sup>    | -                    | 1.0            | 6.3 <sup>†***</sup>  | -                      | 1.6 <sup>†*</sup>   |
| Caspase3            | 1.0          | 1.5 <sup>†*</sup>   | 1.7 <sup>†*</sup>    | 1.3 <sup>†</sup>     | 1.0            | -                    | -                      | 3.7 <sup>†***</sup> |
| Cleaved-caspase     | 1.0          | 10 <sup>†***</sup>  | 3.7 <sup>†***</sup>  | 6.0 <sup>†***</sup>  | 1.0            | 8.5 <sup>†***</sup>  | 3.26 <sup>†***</sup>   | 3.6 <sup>†***</sup> |

**Table 1B.** The-fold change of the protein markers (adipogenic, immune and metabolic signaling) levels compared to their sex matched control mice are presented in Table 1B analyzed in adipose tissue (WAT). The-fold changes were analyzed by comparing the protein's normalized level (GDI or  $\beta$ -actin) in infected groups (CoV2/*T. cruzi*) to that in uninfected (control) mice, for males and females separately. For the coinfecting mice, since the baseline is *T. cruzi* infection, the-fold change was calculated for coinfecting mice relative to *T. cruzi* infected mice (for males and females separately). The increase and decrease in the comparative-fold change are presented by an upward or downward arrow, respectively (\*  $p \leq 0.05$ , \*\*  $p \leq 0.01$  and \*\*\*  $p \leq 0.001$  represents the significance). N=3-4/group.

296 matched control mice (Fig. 4A). Interestingly, CoV2 infection *T. cruzi* infected mice significantly  
 297 increased the levels of both PPAR $\gamma$  and FABP4 in males (5.3-fold and 1.9-fold, respectively), but  
 298 significantly decreased both of them in females (3-fold and 2.5-fold, respectively) compared to sex  
 299 matched *T. cruzi* infected mice (Table 1B). These results demonstrated that adipogenic signaling is

300 increased in female CoV2 infected mice and male coinfecting mice compared to their respective sex  
301 matched infection controls.

302 **CoV2 infection and coinfection differently alter immune signaling in WAT in male and female**

303 **mice:** Immunoblot analysis in WAT lysates demonstrated significant differences in the protein levels of  
304 WAT immune cells (CD4, CD8, and macrophage marker F4/80) and inflammatory markers (TNF $\alpha$ , IL-6  
305 and IL-10) between the sexes and infections (Fig. 4B, Table 1B). Uninfected female mice showed  
306 significantly lower levels of resident CD4 and CD8 cells (1.3-fold and 3.6-fold, respectively) and  
307 increased F4/80 levels (1.5-fold) compared to uninfected male mice (Fig. 4B). CoV2 infection increased  
308 the infiltration of CD4, CD8 and F4/80 in WAT in both males (1.6-, 2.7- and 3.2-fold, respectively) and  
309 females (6.15-, 7.2- and 7.11-fold, respectively) compared to their respective sex matched uninfected  
310 mice. However, the levels of immune cells (CD4, CD8 and macrophages) were significantly increased in  
311 WAT in female CoV2 mice compared to male CoV2 mice. *T. cruzi* infection increased only CD8 levels in  
312 WAT in both male and female mice (2.2-fold and 2-fold, respectively) compared to sex matched control  
313 mice. The coinfection significantly increased CD4, CD8 and F4/80 levels (1.5, 1.9 and 2.4-fold,  
314 respectively) in WAT in male coinfecting mice, whereas only the levels of F4/80 significantly increased  
315 (1.7-fold) in female coinfecting mice compared to sex matched *T. cruzi* infected mice (Fig. 4B).

316 The levels of proinflammatory TNF $\alpha$  were significantly higher (2-fold) in WAT in female uninfected  
317 mice compared to male uninfected mice (Fig. 4B). CoV2 infection further increased (2-fold) the levels of  
318 TNF $\alpha$  in female mice. No significant change in the levels of IL-6 was observed in either male or female  
319 CoV2 infected mice compared to the sex matched control groups. *T. cruzi* infection increased the levels of  
320 TNF $\alpha$  and IL-6 in WAT in male mice (2- and 3-fold, respectively) and TNF $\alpha$  decreased significantly in  
321 female (1.7-fold) mice compared to sex matched control mice (Fig. 4B, Table 1B). CoV2 infection further  
322 decreased (2-fold) the levels of TNF $\alpha$  in *T. cruzi* infected female mice (coinfecting state) compared to *T.*  
323 *cruzi* infected female mice. The levels of anti-inflammatory IL-10 significantly increased in WAT of  
324 males and females (1.4- and 2-fold, respectively) in CoV2 infected mice compared to sex matched control



325 mice. The levels of IL-10 decreased in WAT of male and female (3- and 1.8-fold, respectively) in *T. cruzi*  
326 infected mice compared to sex matched control mice. However, the levels of IL-10 significantly increased  
327 (3.3-fold) only in WAT of male coinfecting mice compared to male *T. cruzi* infected mice, whereas no  
328 change was observed in female coinfecting mice (Fig. 4B). These data demonstrated that CoV2 infection  
329 induces stronger WAT proinflammatory signaling in females compared to males, but that *T. cruzi*  
330 coinfection provokes stronger WAT proinflammatory signaling in males compared to females (Table 1B).

331 **CoV2 infection and coinfection cause different types of cell death (apoptosis vs necrosis) in WAT of**

332 **male and female mice:** Histological analysis demonstrated significant loss of adipocytes in CoV2, *T.*  
333 *cruzi* and coinfecting mice compared to their respective control groups (Supplemental Fig. 2). We  
334 analyzed whether the cause for the loss of adipocytes was due to apoptosis or necrosis by quantitating the  
335 protein levels of cleaved caspase 3 and BNIP3, respectively, in WAT (Fig. 4C). In WAT of uninfected  
336 female mice, the levels of cleaved caspase 3 were significantly higher (3.7-fold) and the levels of BNIP3  
337 significantly lower (1.8-fold) compared to uninfected male mice, which suggest that in WAT of female  
338 mice the process of cell death is predominantly due to apoptosis. CoV2 infection increased the levels of  
339 cleaved caspase 3 and BNIP3 in both males (10- and 1.7-fold, respectively) and females (8.5- and 6.3-  
340 fold, respectively) compared to sex matched control mice (Fig. 4C, Table 1B). However, the levels of  
341 necrotic cell death were greater in female WAT compared to male WAT in CoV2 infected mice (Table  
342 1B). *T. cruzi* infection increased the levels of cleaved caspase 3 in WAT of both males and females (6-  
343 and 3.6-fold, respectively) and increased BNIP3 only in females (1.6-fold) compared to sex matched  
344 control mice. Coinfection further increased the levels of cleaved caspase 3 in WAT of both males and  
345 females (3.7- and 3.3-fold, respectively) and increased BNIP3 only in males (1.4-fold) compared to sex  
346 matched *T. cruzi* infected mice. These data indicated that during CoV2 infection adipose tissue is  
347 predominantly lost via apoptotic cell death and that necrotic WAT cell death is greater in female mice  
348 compared to male mice. In contrast, in coinfecting mice, although apoptotic cell signaling also



349 predominates in both male and female mice, necrotic signaling is higher in male mice compared to female  
350 mice.

351 **Sex dependent morphological changes in the hearts of mice infected with CoV2, *T. cruzi* and**

352 **coinfection:** We have shown that CoV2 infects and persists in the hearts of intra-nasally infected mice  
353 (Fig. 1B). Histological analysis of the hearts was performed using H&E and Masson-trichrome stained  
354 sections as described in Materials and Methods. Microscopic analysis of the heart sections of CoV2  
355 infected mice demonstrated the presence of infiltrated immune cells, increased accumulation of lipid  
356 droplets in the capillaries, enlarged cardiomyocyte nucleus, and fibrosis compared to control mice (Fig.  
357 5A and 5B). The H&E sections showed significantly reduced cytoplasmic coloration in LV in female *T.*  
358 *cruzi* infected and coinfecting mice compared to their sex matched counterparts (Fig. 5A). RV in *T. cruzi*  
359 infected mice showed increased fibrosis compared to control mice. Coinfecting mice showed significantly  
360 elevated fibrosis compared to *T. cruzi* infected mice (Fig. 5B). The levels of accumulated lipid droplets in  
361 the capillaries, infiltrated immune cells and fibrosis in RV in male coinfecting mice were significantly  
362 greater compared to female coinfecting mice (Fig. 5B) (Supplemental Fig. 3).

363 We performed the morphometric analysis of the hearts as described in Materials and Methods section.  
364 The thickness of the left ventricular wall (LVW), right ventricular wall (RVW) and septal wall (SW)  
365 differed between males and females and infected and coinfecting mice compared to sex matched control  
366 mice (Supplemental Table 1). LVW thickness significantly decreased in female CoV2 and *T. cruzi*  
367 infected mice compared to female control mice; however, no significant difference was observed in  
368 female coinfecting mice. LVW thickness in male CoV2/*T. cruzi* infected and coinfecting mice showed no  
369 significant differences compared to male control mice. RVW thickness significantly decreased in female  
370 control mice compared to male control mice, and was further decreased in female coinfecting mice.  
371 Interestingly, the thickness of RVW was significantly reduced in male coinfecting mice compared to male  
372 *T. cruzi* infected mice, which was not observed for female coinfecting and *T. cruzi* infected mice. SW

373 thickness increased in female CoV2 mice and was inversely proportional to the decreased LVW thickness  
374 compared to female control mice.

375 **CoV2 infection alters cardiac adiponectin (C-ApN) levels and adiponectin (ApN) signaling in the**  
376 **hearts in coinfecting mice:** We detected no change in parasite load in the hearts between *T. cruzi* and  
377 coinfecting mice (data not shown); however, we observed significant heart morphological changes,  
378 including accumulation of lipid droplets (Fig. 5). Previously we showed a strong correlation between C-  
379 ApN levels and progression of cardiomyopathy during CD, wherein elevated levels of C-ApN were  
380 associated with mortality due to cardiac dilation [20]. Here, we used native gel electrophoresis to  
381 quantitate HMW-ApN and SDS-PAGE to quantitate the levels of globular ApN (gAd) to determine  
382 whether the distribution pattern of ApN in the hearts differed between the sexes and infections (Fig. 6A).  
383 The levels of C-HMW ApN did not change, but gAd significantly decreased in uninfected female mice  
384 compared to uninfected male mice (Fig. 6A). The-fold changes in the levels of C-HMW Apn and C-gAd  
385 in the mice (males and females) during CoV2, *T. cruzi* and coinfection compared to their respective  
386 controls are presented in Table 1C. CoV2 and *T. cruzi* infections significantly increased C-HMW ApN  
387 levels (1.6- and 4.3-fold, respectively) and significantly decreased gAd (2.5- and 5.0-fold, respectively) in  
388 infected male mice compared to uninfected male mice. In females, *T. cruzi* infection significantly  
389 increased C-HMW ApN (2.9-fold), whereas both CoV2 and *T. cruzi* infections significantly increased  
390 gAd (5.6- and 1.8-fold, respectively) levels compared to uninfected female mice. Although the levels of  
391 HMW and gAd differed between the males and females during CoV2 and *T. cruzi* infections, the levels of  
392 HMW ApN and gAd showed a similar trend between males and females during coinfection. The levels of  
393 HMW decreased in the hearts of coinfecting mice, whereas the levels of gAd significantly increased in the  
394 hearts of both males (30-fold) and females (23.8-fold) in coinfecting mice compared to the sex matched *T.*  
395 *cruzi* infected mice. The data indicate that in CoV2/*T.cruzi*/coinfection group males had higher levels of  
396 C-HMW ApN, whereas infected females had higher levels of C-gAd compared to their counterparts of the  
397 opposite sex (Fig. 6A).

| Protein Marker (FC) | Male         |                     |                      |                     | Female         |                     |                        |                     |
|---------------------|--------------|---------------------|----------------------|---------------------|----------------|---------------------|------------------------|---------------------|
|                     | Control Male | CoV2 Male           | <i>T. cruzi</i> Male | Co infect Male      | Control Female | CoV2 Female         | <i>T. cruzi</i> Female | Co infect Female    |
| HMW ApN             | 1.0          | 1.6 <sup>†*</sup>   | 4.3 <sup>†**</sup>   | 1.1 <sup>↓</sup>    | 1.0            | 1.1 <sup>↑</sup>    | 2.9 <sup>†**</sup>     | 1.7 <sup>↓**</sup>  |
| gAd                 | 1.0          | 2.5 <sup>†**</sup>  | 5.0 <sup>†**</sup>   | 30.0 <sup>†**</sup> | 1.0            | 5.6 <sup>†**</sup>  | 1.8 <sup>†**</sup>     | 23.8 <sup>†**</sup> |
| Adipo R1            | 1.0          | 11.9 <sup>†**</sup> | 2.8 <sup>†**</sup>   | 8.1 <sup>†**</sup>  | 1.0            | 13 <sup>†**</sup>   | 2.0 <sup>†**</sup>     | 2.24 <sup>†**</sup> |
| Adipo R2            | 1.0          | 1.7 <sup>↓**</sup>  | 1.2 <sup>↓*</sup>    | 1                   | 1.0            | 5.35 <sup>↓**</sup> | 1.4 <sup>↓*</sup>      | 2.2 <sup>↓**</sup>  |
| T-Cadherin          | 1.0          | 1                   | 2.0 <sup>↓*</sup>    | 4.8 <sup>†**</sup>  | 1.0            | 4.1 <sup>†**</sup>  | 1                      | 2.0 <sup>↓*</sup>   |
| F4/80               | 1.0          | 2.0 <sup>†**</sup>  | 2.6 <sup>↓**</sup>   | 13.0 <sup>†**</sup> | 1.0            | 1.8 <sup>↓**</sup>  | 2.1 <sup>↓**</sup>     | 1.5 <sup>†**</sup>  |
| TNF- $\alpha$       | 1.0          | 2.8 <sup>†**</sup>  | 1.6 <sup>↓**</sup>   | 5.9 <sup>†**</sup>  | 1.0            | 2.1 <sup>↓**</sup>  | 1.2 <sup>†**</sup>     | 1.0 <sup>†**</sup>  |
| PPAR- $\gamma$      | 1.0          | 4.0 <sup>†**</sup>  | 3.6 <sup>†**</sup>   | 5.2 <sup>†**</sup>  | 1.0            | 5.3 <sup>†**</sup>  | 1.9 <sup>†**</sup>     | 3.4 <sup>†**</sup>  |
| pAMPK               | 1.0          | 5.8 <sup>†**</sup>  | 1.6 <sup>↓**</sup>   | 5.2 <sup>†**</sup>  | 1.0            | 1.6 <sup>↓**</sup>  | 2.2 <sup>↓**</sup>     | 6.2 <sup>†**</sup>  |
| PPAR- $\alpha$      | 1.0          | 1.9 <sup>†**</sup>  | 1.7 <sup>†**</sup>   | 2.7 <sup>†**</sup>  | 1.0            | 2.3 <sup>↓**</sup>  | 1.1 <sup>†**</sup>     | 15.0 <sup>†**</sup> |
| CytC                | 1.0          | 7.3 <sup>†**</sup>  | 2.5 <sup>↓**</sup>   | 6.8 <sup>†**</sup>  | 1.0            | 1.0 <sup>↓**</sup>  | 2.5 <sup>↓**</sup>     | 21.2 <sup>†**</sup> |
| SOD                 | 1.0          | 1.4 <sup>†**</sup>  | 2.5 <sup>†**</sup>   | 3.6 <sup>†**</sup>  | 1.0            | 1.4 <sup>†**</sup>  | 2.0 <sup>†**</sup>     | 3.5 <sup>†**</sup>  |
| $\beta$ -AR         | 1.0          | 3.4 <sup>†**</sup>  | 1.7 <sup>†**</sup>   | 5.8 <sup>†**</sup>  | 1.0            | 1.9 <sup>↓**</sup>  | 1.1 <sup>†**</sup>     | 21.3 <sup>†**</sup> |
| HK                  | 1.0          | 7.6 <sup>†**</sup>  | 1.4 <sup>↓**</sup>   | 4.2 <sup>†**</sup>  | 1.0            | 1.7 <sup>†**</sup>  | 1.5 <sup>↓**</sup>     | 66.7 <sup>†**</sup> |

**Table 1C.** The-fold change of the protein markers (adipogenic, immune and metabolic signaling) levels compared to their sex matched control mice are presented in Table 1B analyzed in the heart. The-fold changes were analyzed by comparing the protein's normalized level (GDI or  $\beta$ -actin) in infected groups (CoV2/*T. cruzi*) to that in uninfected (control) mice, for males and females separately. For the coinfecting mice, since the baseline is *T. cruzi* infection, the-fold change was calculated for coinfecting mice relative to *T. cruzi* infected mice (for males and females separately). The increase and decrease in the comparative-fold change are presented by an upward or downward arrow, respectively (\*  $p \leq 0.05$ , \*\*  $p \leq 0.01$  and \*\*\*  $p \leq 0.001$  represents the significance). N=4/group.

398 The levels of AdipoR1, AdipoR2 and T-cadherin were significantly altered in the hearts between the  
399 sexes and infections (Fig. 6B, Table 1C). In particular, the levels of R1 significantly increased in CoV2  
400 and *T. cruzi* infected mice compared to their sex matched control mice (Fig. 6B). AdipoR1 significantly  
401 increased (2-fold) in the hearts of coinfecting male mice compared to coinfecting female mice (Fig. 6B).  
402 The levels of AdipoR2 significantly decreased in infected and coinfecting mice compared to their  
403 respective sex matched control mice. The levels of AdipoR2 in the hearts in female mice were  
404 significantly decreased compared to their male counterparts (Fig. 6B). The levels of T-cadherin  
405 significantly increased (4-fold) in female CoV2 mice compared to male coV2 mice (Fig. 6B); however,

406 coinfecting mice showed significantly decreased levels of T-cadherin in both male and female mice  
407 compared to sex matched *T. cruzi* infected mice (Table 1C).

408 **CoV2 infection differently alters cardiac lipid and glucose metabolism in the hearts in coinfecting**

409 **male and female mice:** ApN regulates lipid (via PPARs) and glucose (AMPK/glycolysis) metabolism

410 [30-33]. We analyzed the levels of PPARs in the hearts as markers of lipid metabolism (lipid oxidation

411 (PPAR $\alpha$ ), lipogenesis (PPAR $\gamma$ )) and AMPK/pAMPK and hexokinase II (HK) as markers of glucose

412 metabolism (Fig. 6C, Table 1C). Western blotting analysis of PPARs demonstrated significantly

413 increased PPAR $\gamma$  in the hearts of CoV2 and *T. cruzi* infected mice compared to control mice both in

414 males and females. CoV2 infection further significantly elevated the levels of PPAR $\gamma$  in coinfecting males

415 (5.2-fold) and coinfecting females (3.4-fold) compared to *T. cruzi* infected mice. *T. cruzi* infected and

416 coinfecting male mice displayed greater levels of PPAR $\gamma$  compared to their respective female counterparts,

417 suggesting increased adipogenic/lipogenic signaling in males compared to females. The levels of PPAR $\alpha$

418 significantly increased in male CoV2 and *T. cruzi* infected mice (1.9- and 1.7-fold, respectively) and

419 significantly decreased in female CoV2 and *T. cruzi* infected mice (2.3- and 1.1-fold, respectively)

420 compared to sex matched control mice (Fig. 6C, Table 1C). Although coinfection significantly increased

421 PPAR $\alpha$  in the hearts of both male (2.7-fold) and female (15-fold) mice compared to sex matched *T. cruzi*

422 infected mice, the levels of PPAR $\alpha$  in the hearts of coinfecting female mice were significantly greater

423 compared to coinfecting male mice (Table 1C). The PPARs regulate cardiac beta 1 adrenergic receptor

424 ( $\beta$ 1AR), which regulates lipolysis and contractility of ventricular cardiac muscle [34]. CoV2 infection

425 significantly increased  $\beta$ 1AR levels in males (3.4-fold) and significantly decreased  $\beta$ 1AR in females (1.9-

426 fold) compared to sex matched control mice (Fig. 6D). However, coinfection significantly increased

427  $\beta$ 1AR levels in the hearts in both male (5.8-fold) and female (21.3-fold) mice compared to sex matched *T.*

428 *cruzi* infected mice.

429 The levels of pAMPK and HK significantly increased (5.8- and 7.6-fold, respectively) in CoV2 infected

430 male mice and significantly decreased (1.6- and 1.4-fold, respectively) in *T. cruzi* infected male mice

431 compared to control male mice (Fig. 6C and 6D, Table 1C). However, coinfection significantly increased  
432 the levels of pAMPK and HK (5.2- and 4.2-fold, respectively) in male mice compared to *T. cruzi* infected  
433 male mice, suggesting that CoV2 infection increases AMPK signaling and glycolysis in the hearts of male  
434 mice. In female mice, CoV2 and *T. cruzi* infections significantly decreased the levels of pAMPK (1.6-  
435 and 2.2-fold, respectively) compared to uninfected control female mice. The levels of HK significantly  
436 increased in female CoV2 mice (1.7-fold) and significantly decreased in female *T. cruzi* infected mice  
437 (1.5-fold) compared to control female mice. However, although the levels of pAMPK significantly  
438 increased (6.2-fold), the levels of HK significantly decreased (66.7-fold) in the hearts of coinfecting  
439 female mice compared to *T. cruzi* infected female mice, suggesting that the glycolytic pathways may not  
440 serve as the main energy resource in the hearts of female coinfecting mice (Table 1C).

441 Alterations in cardiac lipid and glucose metabolism may modify the mitochondrial energy pathway and  
442 production of reactive oxygen species [35, 36]. Increased PPAR $\alpha$  elevates mitochondrial  $\beta$  oxidation and  
443 release of reactive oxygen species (ROS) in the hearts during infection, which can impact the progression  
444 of CCM [36, 37]. Therefore, we analyzed the levels of Cytochrome C (CytoC) and superoxide dismutase  
445 (SOD) in the hearts by Western blotting (Fig. 6D, Table 1C). CoV2 infection significantly increased  
446 CytoC and SOD levels in males (7.3- and 1.4-fold, respectively) and significantly decreased SOD in  
447 females (1.4-fold) compared to sex matched control mice. *T. cruzi* infection significantly decreased  
448 CytoC and significantly increased SOD in the hearts in both male and female mice compared to sex  
449 matched control mice. Coinfection significantly increased CytoC and SOD levels in males (6.8- and 3.6-  
450 fold, respectively) and females (21.2- and 3.5-fold, respectively) compared to sex matched *T. cruzi*  
451 infected mice. Although the levels of SOD were similar in the hearts of male and female coinfecting mice,  
452 the levels of CytoC were significantly greater in the hearts of female mice compared to male mice,  
453 showing a positive correlation with their respective PPAR $\alpha$  levels. Together, these data suggested that  
454 lipid catabolism and oxidation is greater in female hearts compared to male hearts in coinfecting mice  
455 which may prevent the progression of cardiac dilation due to intracellular lipotoxicity [38]. Increased

456 lipogenesis due to increased PPAR $\gamma$  in the hearts of male coinfecting mice may likely induce early dilated  
457 cardiomyopathy in post-COVID mice.

458 **Cardiac immune signaling differs between male and female mice during CoV2 and *T. cruzi***  
459 **infections and coinfection:** Because alteration in cardiac metabolism may affect immune signaling, we  
460 analyzed the levels of infiltrated macrophages and the levels of proinflammatory TNF $\alpha$  in the hearts by  
461 immunoblot analysis (Fig. 6D). The levels of F4/80 and TNF $\alpha$  significantly increased (2.0- and 2.8-fold,  
462 respectively) in the hearts of CoV2 infected male mice and significantly decreased (1.8- and 2.1-fold,  
463 respectively) in the hearts of CoV2 infected female mice compared to respective sex matched control  
464 mice. We also observed significantly reduced levels of macrophages in *T. cruzi* infected mice.  
465 Interestingly, the levels of macrophage marker F4/80 significantly increased in male coinfecting mice  
466 compared to female coinfecting mice, but the levels of TNF $\alpha$  significantly decreased in male coinfecting  
467 mice compared to female coinfecting mice, revealing differences in inflammatory signaling between male  
468 and female coinfecting mice.

## 469 **DISCUSSION**

470 Many clinical and *in vivo* studies have examined the effect of comorbidities such as diabetes, asthma,  
471 hypertension and cardiac diseases on the pulmonary pathogenesis and susceptibility to CoV2 infection.  
472 However, the effects of metabolic and immunologic changes associated with chronic infectious disease on  
473 the risk of developing severe COVID have not been extensively investigated and neither have been the  
474 post-COVID effects on the manifestation/activation of other infectious diseases. This study examines (i)  
475 the effect of changes in the immune and metabolic status due to *T. cruzi* infection during an indeterminate  
476 stage on susceptibility to pulmonary CoV2 infection and (ii) the effect of CoV2 infection on the  
477 pathogenesis and risk of developing cardiomyopathy in *T. cruzi* infected and uninfected mice. Moreover,  
478 this study assesses whether the relationship during *T. cruzi* and CoV2 infections differs between male and  
479 female sexes. Specifically, to understand the interplay between *T. cruzi* and CoV2 infections we used  
480 transgenic hACE2 mice (males and females) nasally infected with SARS-CoV2 mice pre-infected with *T.*

481 *cruzi*. Our study revealed that: (a) *T. cruzi* infection alters immune and metabolic status in the lungs but  
482 reduces the pulmonary SARS-CoV2 load in coinfecting mice compared to CoV2 alone infected mice, (b)  
483 CoV2 infection alters immune and metabolic status in the hearts and may increase the risk of developing  
484 cardiomyopathy in *T. cruzi* infected mice, and (c) CoV2 persists in adipose tissue, altering adipose tissue  
485 physiology, which may regulate pulmonary pathology during CoV2 infection and coinfection. More  
486 importantly, our study showed that the impact of CoV2 and *T. cruzi* infections and coinfection is sex  
487 dependent: male CoV2 and *T. cruzi* singly infected mice were more susceptible to developing pulmonary  
488 disease and cardiac disease, respectively, female coinfecting mice were susceptible to developing  
489 pulmonary disease, and male coinfecting mice were susceptible to developing post-COVID  
490 cardiomyopathy.

491 The histopathology of the lungs in CoV2 infected and coinfecting mice correlated with the viral loads in  
492 both male and female mice. Many clinical studies indicate that males are more susceptible to CoV2 and *T.*  
493 *cruzi* infections compared to females [18, 19, 39-42]. Our animal data supported these clinical data and  
494 showed increased viral loads and pulmonary pathology in male CoV2 mice compared to female CoV2  
495 mice. Out of the three organs we analyzed for viral load, the lungs showed the greatest levels of the virus,  
496 followed by WAT and the hearts. Interestingly, even though the viral load in the lungs in CoV2 infected  
497 female mice was lower compared to male mice, the viral load in WAT in female mice was significantly  
498 higher compared to male mice. Thus, we observed an inverse correlation between the viral loads in the  
499 lungs and in the WAT in CoV2 infected male and female mice. These data suggest that WAT may play a  
500 major role in regulating pulmonary viral load and pathology during COVID. Indeed, previously we  
501 demonstrated that pathogens like *T. cruzi* and *Mycobacterium tuberculosis* persists in WAT and that loss  
502 of fat cells increases the risk of disease manifestation. For example, we showed that loss of body fat  
503 correlated to increased cardiomyopathy in chronic Chagas disease murine model and increased pulmonary  
504 pathology in aerosol infected TB murine model [20, 22]. Our current study suggests that WAT may serve  
505 as a reservoir for CoV2, sparing the lungs from the viral burden and infection severity. It is well



506 documented that females have higher body fat content compared to males and the fat distribution pattern  
507 differs between the sexes, which constitute one reason why males are more susceptible to pulmonary  
508 CoV2 infection.

509 Our study shows for the first time that the persistence of CoV2 in WAT alters adipose tissue morphology  
510 and adipocyte physiology. We showed a significant decrease in the size of lipid droplets and a loss of  
511 lipid droplets in WAT of CoV2 infected mice. Both male and female mice demonstrated increased  
512 apoptotic and necrotic cell death during CoV2 infection and *T. cruzi* coinfection. However, female CoV2  
513 mice and male coinfecting mice demonstrated increased adipogenic signaling compared to their respective  
514 sex groups, which suggests that increased adipogenic signaling might promote adipogenesis and reverse  
515 the loss of lipid droplets. Adipogenesis in WAT in female CoV2 and coinfecting mice may help the virus  
516 to persist in WAT and spare the lungs, as discussed above. In addition, the levels of infiltrated immune  
517 cells (CD4, CD8 and macrophages) in the lungs likely prevent high viral load in CoV2 infected female  
518 mice (compared to CoV2 infected male mice) by increasing pro-inflammatory TNF $\alpha$  levels. However, the  
519 levels of TNF $\alpha$  and IFN $\gamma$  significantly increased in the lungs in both coinfecting males and females  
520 compared to sex matched *T. cruzi* infected mice, and these levels were significantly higher in coinfecting  
521 male mice compared to coinfecting female mice (Table 1A), which may explain why the viral load is  
522 significantly lower in the lungs of coinfecting male mice compared to coinfecting female mice. In addition,  
523 *T. cruzi* infection-induced increase in infiltrated immune cells likely prevented early replication of virus  
524 in the lungs in coinfecting mice.

525 Previously, we showed that loss of adipocytes correlates to pulmonary adipogenesis and ApN levels in *M.*  
526 *tuberculosis* infected mice [22]. This connection between metabolism and immune activation prompted us  
527 to analyze the levels of ApN, a metabolic and immune regulator, in the lungs in CoV2 and *T. cruzi*  
528 infected and coinfecting mice. We measured the levels of lung high-molecular weight ApN (L-HMW  
529 ApN), a.k.a. its anti-inflammatory/anti-fibrotic/metabolically active form [26, 27] and lung gAd (L-gAd),  
530 a.k.a. its pro-inflammatory form [28]. Our data suggest that female mice respond better to infections like



531 CoV2 and *T. cruzi* than male mice by increasing gAd levels and inducing pro-inflammatory signaling in  
532 the lungs. Although the levels of L-HMW ApN significantly increased in *T. cruzi* infected mice, during  
533 coinfection their levels significantly decreased, whereas the levels of L-gAd increased. It has been shown  
534 that macrophage elastases cleave ApN to generate gAd [43]. Our data suggest that during *T. cruzi*  
535 infection the infiltrated macrophages might cleave full length ApN to gAd and create a pro-inflammatory  
536 environment at the initial stages of CoV2 infection, thus reducing the viral load in the lungs in coinfecting  
537 mice compared to CoV2 infected mice.

538 Similar to the changes in the metabolic and immunologic conditions in the lungs during CoV2 and  
539 coinfection, we observed altered HMW-ApN and gAd in the hearts, which significantly differed between  
540 males and females (Table 1C). These alterations in ApN levels and adipogenic signaling may regulate  
541 energy metabolism differently in the hearts of male and female coinfecting mice. Our data showed that  
542 higher C-gAd levels correlated with increased PPAR $\alpha$ , pAMPK, CytoC, and  $\beta$ 1AR and decreased HK in  
543 female coinfecting hearts compared to male coinfecting hearts (Table 1C). Although the levels of SOD  
544 increased in female coinfecting mice in response to the ROS generated during  $\beta$ -oxidation, these levels of  
545 SOD are likely not enough to neutralize all the ROS generated compared to male coinfecting mice  
546 (compared to CytC levels between the sexes). The significant increase in the levels of  $\beta$ -oxidation may  
547 increase the LV contractile power [44]. The levels of  $\beta$ 1AR correlated to the levels of PPAR $\alpha$  in the  
548 hearts, suggesting that PPAR $\alpha$ -induced fatty acid oxidation may increase  $\beta$ 1AR levels, causing elevated  
549 contractility of ventricles. Our data suggest that the significant increase in ApN-PPAR $\alpha$  induced  
550 mitochondrial  $\beta$ -oxidation of lipids in the hearts may be the cause for the reduced heart size (shrunken  
551 heart) in female coinfecting mice, a condition similar to that observed in Acetyl-coA carboxylase (ACC2,  
552 an enzyme involved in fatty acid biosynthesis) mutant mice [45]. On the other hand, significantly  
553 increased HMW ApN levels in the hearts correlated with increased PPAR $\gamma$  and HK in male coinfecting  
554 mice compared to female coinfecting mice (Table 1C), which suggests that the hearts of male coinfecting

555 mice may utilize energy derived from glycolysis and store lipids in the form of triglycerides  
556 (adipogenesis/lipogenesis).

557 Increased C-HMW ApN and PPAR $\gamma$  elevates vascular dilation [46, 47]. Earlier we have demonstrated a  
558 correlation between increased cardiac ApN, lipid accumulation and cardiomyopathy [37]. We also  
559 showed a correlation between altered metabolic status and immune status in the hearts. Although the  
560 levels of macrophages significantly increased in male coinfecting mice compared to female coinfecting  
561 mice, TNF levels were significantly decreased in males. These data suggested that increased ApN-PPAR $\gamma$   
562 associated signaling in the hearts of male coinfecting mice might have induced an anti-inflammatory  
563 response by altering macrophage polarization from the M1 to the M2 form. Thus, in coinfecting mice,  
564 males and females showed different heart phenotypes, which correlated with increased PPAR $\gamma$  and  
565 PPAR $\alpha$  levels, respectively. Overall, these data suggest that CoV2 infection and coinfection with *T. cruzi*  
566 differently affect cardiac metabolic and immune status in male and female mice via host C-ApN levels  
567 and signaling. Thus, the C-ApN-PPAR $\alpha$  and ApN-PPAR $\gamma$  signaling axes may play major roles in  
568 determining the progression and severity of CCM in the context of COVID.

569 The present study investigated the immediate effect of CoV2 infection on the pathology of the lungs and  
570 hearts in CoV2 and *T. cruzi* (coinfection) infected mice, while any potential long-term effects still remain  
571 to be explored. Further studies including a greater number of male and female mice at different time  
572 stamps are warranted to evaluate the long-term post-COVID effects on the development and progression  
573 of Chagas cardiomyopathy.

## 574 **CONCLUSION**

575 Our data demonstrated that SARS-CoV2 infects adipocytes, persists in adipose tissue, and causes a loss of  
576 adipocytes and lipid droplets. The loss of fat cells correlates to the pulmonary adipogenic signaling via  
577 ApN isomers. We showed that the levels of L-HMW and gAd differ between male and female mice  
578 during CoV2 infection and coinfection, which may differently regulate inflammation, viral load, and

579 pathology in the lungs in males and females. These findings may underpin the clinical observations that  
580 males are more susceptible to COVID than females and suffer greater pulmonary damage. Our study also  
581 suggests that the severity of CoV2 infection may be lower in the lungs of *T. cruzi* pre-infected subjects  
582 due to increased proinflammatory status in the lungs. However, the risk of developing dilated  
583 cardiomyopathy in *T. cruzi* infected males may be greater than females coinfecting with CoV2.

## 584 **ACKNOWLEDGMENTS**

585 We thank Erika Shor at the Center for Discovery and Innovation, Hackensack University for a critical  
586 reading of the manuscript. We also thank Steven Park at the CDI for the managerial support to executing  
587 the BSL3 work. This study was supported by grants from the National Institute of Allergy and Infectious  
588 Diseases (National Institutes of Health AI150765-01) to Jyothi Nagajyothi.

589 None of the authors have a conflict of interest.

590

## 591 **REFERENCES**

- 592 1. W.H.O. [08-16-2021]. Available from: [https://www.who.int/emergencies/diseases/novel-](https://www.who.int/emergencies/diseases/novel-coronavirus-2019)  
593 [coronavirus-2019](https://www.who.int/emergencies/diseases/novel-coronavirus-2019).
- 594 2. Guo W, Li M, Dong Y, Zhou H, Zhang Z, Tian C, et al. Diabetes is a risk factor for the  
595 progression and prognosis of COVID-19. *Diabetes Metab Res Rev*. 2020:e3319. Epub 2020/04/02. doi:  
596 10.1002/dmrr.3319. PubMed PMID: 32233013; PubMed Central PMCID: PMC7228407.
- 597 3. Dietz W, Santos-Burgoa C. Obesity and its Implications for COVID-19 Mortality. *Obesity (Silver*  
598 *Spring)*. 2020;28(6):1005. Epub 2020/04/03. doi: 10.1002/oby.22818. PubMed PMID: 32237206.
- 599 4. Li B, Yang J, Zhao F, Zhi L, Wang X, Liu L, et al. Prevalence and impact of cardiovascular  
600 metabolic diseases on COVID-19 in China. *Clin Res Cardiol*. 2020;109(5):531-8. Epub 2020/03/13. doi:  
601 10.1007/s00392-020-01626-9. PubMed PMID: 32161990; PubMed Central PMCID: PMC7087935.

- 602 5. Driggin E, Madhavan MV, Bikdeli B, Chuich T, Laracy J, Biondi-Zoccai G, et al. Cardiovascular  
603 Considerations for Patients, Health Care Workers, and Health Systems During the COVID-19 Pandemic.  
604 J Am Coll Cardiol. 2020;75(18):2352-71. Epub 2020/03/24. doi: 10.1016/j.jacc.2020.03.031. PubMed  
605 PMID: 32201335; PubMed Central PMCID: PMC7198856.
- 606 6. Basu-Ray I, Almaddah, N.K., Adeboye, A., Soos, M.P. Cardiac Manifestations Of Coronavirus  
607 (COVID-19). Treasure Island (FL): StatPearls Publishing; 2021. Available from:  
608 <https://www.ncbi.nlm.nih.gov/books/NBK556152/>.
- 609 7. Guo T, Fan Y, Chen M, Wu X, Zhang L, He T, et al. Cardiovascular Implications of Fatal  
610 Outcomes of Patients With Coronavirus Disease 2019 (COVID-19). JAMA Cardiol. 2020;5(7):811-8.  
611 Epub 2020/03/29. doi: 10.1001/jamacardio.2020.1017. PubMed PMID: 32219356; PubMed Central  
612 PMCID: PMC7101506.
- 613 8. Argulian E, Sud K, Vogel B, Bohra C, Garg VP, Talebi S, et al. Right Ventricular Dilation in  
614 Hospitalized Patients With COVID-19 Infection. JACC Cardiovasc Imaging. 2020;13(11):2459-61. Epub  
615 2020/05/20. doi: 10.1016/j.jcmg.2020.05.010. PubMed PMID: 32426088; PubMed Central PMCID:  
616 PMC7228729.
- 617 9. Zhou F, Yu T, Du R, Fan G, Liu Y, Liu Z, et al. Clinical course and risk factors for mortality of  
618 adult inpatients with COVID-19 in Wuhan, China: a retrospective cohort study. Lancet.  
619 2020;395(10229):1054-62. Epub 2020/03/15. doi: 10.1016/S0140-6736(20)30566-3. PubMed PMID:  
620 32171076; PubMed Central PMCID: PMC7270627.
- 621 10. Ranard LS, Fried JA, Abdalla M, Anstey DE, Givens RC, Kumaraiah D, et al. Approach to Acute  
622 Cardiovascular Complications in COVID-19 Infection. Circ Heart Fail. 2020;13(7):e007220. Epub  
623 2020/06/06. doi: 10.1161/CIRCHEARTFAILURE.120.007220. PubMed PMID: 32500721; PubMed  
624 Central PMCID: PMC7126417.
- 625 11. Puntmann VO, Carerj ML, Wieters I, Fahim M, Arendt C, Hoffmann J, et al. Outcomes of  
626 Cardiovascular Magnetic Resonance Imaging in Patients Recently Recovered From Coronavirus Disease  
627 2019 (COVID-19). JAMA Cardiol. 2020;5(11):1265-73. Epub 2020/07/31. doi:

- 628 10.1001/jamacardio.2020.3557. PubMed PMID: 32730619; PubMed Central PMCID:  
629 PMCPMC7385689.
- 630 12. Becker RC. Anticipating the long-term cardiovascular effects of COVID-19. *J Thromb*  
631 *Thrombolysis*. 2020;50(3):512-24. Epub 2020/09/04. doi: 10.1007/s11239-020-02266-6. PubMed PMID:  
632 32880795; PubMed Central PMCID: PMCPMC7467860.
- 633 13. Mitrani RD, Dabas N, Goldberger JJ. COVID-19 cardiac injury: Implications for long-term  
634 surveillance and outcomes in survivors. *Heart Rhythm*. 2020;17(11):1984-90. Epub 2020/07/01. doi:  
635 10.1016/j.hrthm.2020.06.026. PubMed PMID: 32599178; PubMed Central PMCID: PMCPMC7319645.
- 636 14. The L. COVID-19 in Latin America: a humanitarian crisis. *Lancet*. 2020;396(10261):1463. Epub  
637 2020/11/09. doi: 10.1016/S0140-6736(20)32328-X. PubMed PMID: 33160550.
- 638 15. Montgomery SP, Starr MC, Cantey PT, Edwards MS, Meymandi SK. Neglected parasitic  
639 infections in the United States: Chagas disease. *Am J Trop Med Hyg*. 2014;90(5):814-8. Epub  
640 2014/05/09. doi: 10.4269/ajtmh.13-0726. PubMed PMID: 24808250; PubMed Central PMCID:  
641 PMCPMC4015570.
- 642 16. Zheng C, Quintero O, Revere EK, Oey MB, Espinoza F, Puius YA, et al. Chagas Disease in the  
643 New York City Metropolitan Area. *Open Forum Infect Dis*. 2020;7(5):ofaa156. Epub 2020/06/06. doi:  
644 10.1093/ofid/ofaa156. PubMed PMID: 32500090; PubMed Central PMCID: PMCPMC7255644.
- 645 17. Gomez JMD, Du-Fay-de-Lavallaz JM, Fugar S, Sarau A, Simmons JA, Clark B, et al. Sex  
646 Differences in COVID-19 Hospitalization and Mortality. *J Womens Health (Larchmt)*. 2021;30(5):646-  
647 53. Epub 2021/04/08. doi: 10.1089/jwh.2020.8948. PubMed PMID: 33826864.
- 648 18. Basquiera AL, Sembaj A, Aguerri AM, Omelianiuk M, Guzman S, Moreno Barral J, et al. Risk  
649 progression to chronic Chagas cardiomyopathy: influence of male sex and of parasitaemia detected by  
650 polymerase chain reaction. *Heart*. 2003;89(10):1186-90. Epub 2003/09/17. doi: 10.1136/heart.89.10.1186.  
651 PubMed PMID: 12975414; PubMed Central PMCID: PMCPMC1767891.
- 652 19. Assuncao AN, Jr., Jerosch-Herold M, Melo RL, Mauricio AV, Rocha L, Torreao JA, et al.  
653 Chagas' heart disease: gender differences in myocardial damage assessed by cardiovascular magnetic

- 654 resonance. *J Cardiovasc Magn Reson*. 2016;18(1):88. Epub 2016/11/29. doi: 10.1186/s12968-016-0307-  
655 5. PubMed PMID: 27890014; PubMed Central PMCID: PMC5125033.
- 656 20. Lizardo K, Ayyappan JP, Oswal N, Weiss LM, Scherer PE, Nagajyothi JF. Fat tissue regulates  
657 the pathogenesis and severity of cardiomyopathy in murine chagas disease. *PLoS Negl Trop Dis*.  
658 2021;15(4):e0008964. Epub 2021/04/08. doi: 10.1371/journal.pntd.0008964. PubMed PMID: 33826636;  
659 PubMed Central PMCID: PMC8055007.
- 660 21. Nagajyothi F, Weiss LM, Zhao D, Koba W, Jelicks LA, Cui MH, et al. High fat diet modulates  
661 *Trypanosoma cruzi* infection associated myocarditis. *PLoS Negl Trop Dis*. 2014;8(10):e3118. Epub  
662 2014/10/03. doi: 10.1371/journal.pntd.0003118. PubMed PMID: 25275627; PubMed Central PMCID:  
663 PMC4183439.
- 664 22. Ayyappan JP, Ganapathi U, Lizardo K, Vinnard C, Subbian S, Perlin DS, et al. Adipose Tissue  
665 Regulates Pulmonary Pathology during TB Infection. *mBio*. 2019;10(2). Epub 2019/04/18. doi:  
666 10.1128/mBio.02771-18. PubMed PMID: 30992360; PubMed Central PMCID: PMC6469978.
- 667 23. Harash G, Richardson KC, Alshamy Z, Hunigen H, Hafez HM, Plendl J, et al. Heart ventricular  
668 histology and microvasculature together with aortic histology and elastic lamellar structure: A comparison  
669 of a novel dual-purpose to a broiler chicken line. *PLoS One*. 2019;14(3):e0214158. Epub 2019/03/22. doi:  
670 10.1371/journal.pone.0214158. PubMed PMID: 30897149; PubMed Central PMCID: PMC6428391.
- 671 24. Scialo F, Daniele A, Amato F, Pastore L, Matera MG, Cazzola M, et al. ACE2: The Major Cell  
672 Entry Receptor for SARS-CoV-2. *Lung*. 2020;198(6):867-77. Epub 2020/11/11. doi: 10.1007/s00408-  
673 020-00408-4. PubMed PMID: 33170317; PubMed Central PMCID: PMC7653219.
- 674 25. Zamorano Cuervo N, Grandvaux N. ACE2: Evidence of role as entry receptor for SARS-CoV-2  
675 and implications in comorbidities. *Elife*. 2020;9. Epub 2020/11/10. doi: 10.7554/eLife.61390. PubMed  
676 PMID: 33164751; PubMed Central PMCID: PMC7652413.
- 677 26. Pandey GK, Vadivel S, Raghavan S, Mohan V, Balasubramanyam M, Gokulakrishnan K. High  
678 molecular weight adiponectin reduces glucolipotoxicity-induced inflammation and improves lipid  
679 metabolism and insulin sensitivity via APPL1-AMPK-GLUT4 regulation in 3T3-L1 adipocytes.

- 680 Atherosclerosis. 2019;288:67-75. Epub 2019/07/23. doi: 10.1016/j.atherosclerosis.2019.07.011. PubMed  
681 PMID: 31330381.
- 682 27. Choi HM, Doss HM, Kim KS. Multifaceted Physiological Roles of Adiponectin in Inflammation  
683 and Diseases. *Int J Mol Sci.* 2020;21(4). Epub 2020/02/16. doi: 10.3390/ijms21041219. PubMed PMID:  
684 32059381; PubMed Central PMCID: PMC7072842.
- 685 28. Wan Z, Mah D, Simtchouk S, Klegeris A, Little JP. Globular adiponectin induces a pro-  
686 inflammatory response in human astrocytic cells. *Biochem Biophys Res Commun.* 2014;446(1):37-42.  
687 Epub 2014/03/04. doi: 10.1016/j.bbrc.2014.02.077. PubMed PMID: 24582565.
- 688 29. Tabb KL, Gao C, Hicks PJ, Hawkins GA, Rotter JI, Chen YI, et al. Adiponectin Isoform Patterns  
689 in Ethnic-Specific ADIPOQ Mutation Carriers: The IRAS Family Study. *Obesity (Silver Spring).*  
690 2017;25(8):1384-90. Epub 2017/06/24. doi: 10.1002/oby.21892. PubMed PMID: 28643464; PubMed  
691 Central PMCID: PMC5529227.
- 692 30. Astapova O, Leff T. Adiponectin and PPARgamma: cooperative and interdependent actions of  
693 two key regulators of metabolism. *Vitam Horm.* 2012;90:143-62. Epub 2012/09/29. doi: 10.1016/B978-0-  
694 12-398313-8.00006-3. PubMed PMID: 23017715.
- 695 31. Song J, Choi SM, Kim BC. Adiponectin Regulates the Polarization and Function of Microglia via  
696 PPAR-gamma Signaling Under Amyloid beta Toxicity. *Front Cell Neurosci.* 2017;11:64. Epub  
697 2017/03/23. doi: 10.3389/fncel.2017.00064. PubMed PMID: 28326017; PubMed Central PMCID:  
698 PMC5339235.
- 699 32. Tardelli M, Claudel T, Bruschi FV, Moreno-Viedma V, Trauner M. Adiponectin regulates AQP3  
700 via PPARalpha in human hepatic stellate cells. *Biochem Biophys Res Commun.* 2017;490(1):51-4. Epub  
701 2017/06/10. doi: 10.1016/j.bbrc.2017.06.009. PubMed PMID: 28595905.
- 702 33. Dupont J, Chabrolle C, Rame C, Tosca L, Coyral-Castel S. Role of the peroxisome proliferator-  
703 activated receptors, adenosine monophosphate-activated kinase, and adiponectin in the ovary. *PPAR Res.*  
704 2008;2008:176275. Epub 2008/02/22. doi: 10.1155/2008/176275. PubMed PMID: 18288279; PubMed  
705 Central PMCID: PMC2225459.



- 706 34. Alhayek S, Preuss, C.V. Beta 1 Receptors. Treasure Island (FL): StatPearls Publishing; 2021.  
707 Available from: <https://www.ncbi.nlm.nih.gov/books/NBK532904/>.
- 708 35. Sverdlov AL, Elezaby A, Qin F, Behring JB, Luptak I, Calamaras TD, et al. Mitochondrial  
709 Reactive Oxygen Species Mediate Cardiac Structural, Functional, and Mitochondrial Consequences of  
710 Diet-Induced Metabolic Heart Disease. *J Am Heart Assoc.* 2016;5(1). Epub 2016/01/13. doi:  
711 10.1161/JAHA.115.002555. PubMed PMID: 26755553; PubMed Central PMCID: PMCPMC4859372.
- 712 36. Peoples JN, Saraf A, Ghazal N, Pham TT, Kwong JQ. Mitochondrial dysfunction and oxidative  
713 stress in heart disease. *Exp Mol Med.* 2019;51(12):1-13. Epub 2019/12/21. doi: 10.1038/s12276-019-  
714 0355-7. PubMed PMID: 31857574; PubMed Central PMCID: PMCPMC6923355.
- 715 37. Ayyappan JP, Lizardo K, Wang S, Yurkow E, Nagajyothi JF. Inhibition of SREBP Improves  
716 Cardiac Lipidopathy, Improves Endoplasmic Reticulum Stress, and Modulates Chronic Chagas  
717 Cardiomyopathy. *J Am Heart Assoc.* 2020;9(3):e014255. Epub 2020/01/25. doi:  
718 10.1161/JAHA.119.014255. PubMed PMID: 31973605; PubMed Central PMCID: PMCPMC7033903.
- 719 38. Schulze PC. Myocardial lipid accumulation and lipotoxicity in heart failure. *J Lipid Res.*  
720 2009;50(11):2137-8. Epub 2009/08/19. doi: 10.1194/jlr.R001115. PubMed PMID: 19687505; PubMed  
721 Central PMCID: PMCPMC2759818.
- 722 39. Conti P, Younes A. Coronavirus COV-19/SARS-CoV-2 affects women less than men: clinical  
723 response to viral infection. *J Biol Regul Homeost Agents.* 2020;34(2):339-43. Epub 2020/04/08. doi:  
724 10.23812/Editorial-Conti-3. PubMed PMID: 32253888.
- 725 40. Pradhan A, Olsson PE. Sex differences in severity and mortality from COVID-19: are males more  
726 vulnerable? *Biol Sex Differ.* 2020;11(1):53. Epub 2020/09/20. doi: 10.1186/s13293-020-00330-7.  
727 PubMed PMID: 32948238; PubMed Central PMCID: PMCPMC7498997.
- 728 41. Vahidy FS, Pan AP, Ahnstedt H, Munshi Y, Choi HA, Tiruneh Y, et al. Sex differences in  
729 susceptibility, severity, and outcomes of coronavirus disease 2019: Cross-sectional analysis from a  
730 diverse US metropolitan area. *PLoS One.* 2021;16(1):e0245556. Epub 2021/01/14. doi:  
731 10.1371/journal.pone.0245556. PubMed PMID: 33439908; PubMed Central PMCID: PMCPMC7806140.



- 732 42. Schuster JP, Schaub GA. Experimental Chagas disease: the influence of sex and  
733 psychoneuroimmunological factors. *Parasitol Res.* 2001;87(12):994-1000. Epub 2002/01/05. doi:  
734 10.1007/s004360100474. PubMed PMID: 11763443.
- 735 43. Waki H, Yamauchi T, Kamon J, Kita S, Ito Y, Hada Y, et al. Generation of globular fragment of  
736 adiponectin by leukocyte elastase secreted by monocytic cell line THP-1. *Endocrinology.*  
737 2005;146(2):790-6. Epub 2004/11/06. doi: 10.1210/en.2004-1096. PubMed PMID: 15528304.
- 738 44. Lopaschuk GD, Ussher JR, Folmes CD, Jaswal JS, Stanley WC. Myocardial fatty acid  
739 metabolism in health and disease. *Physiol Rev.* 2010;90(1):207-58. Epub 2010/01/21. doi:  
740 10.1152/physrev.00015.2009. PubMed PMID: 20086077.
- 741 45. Essop MF, Camp HS, Choi CS, Sharma S, Fryer RM, Reinhart GA, et al. Reduced heart size and  
742 increased myocardial fuel substrate oxidation in ACC2 mutant mice. *Am J Physiol Heart Circ Physiol.*  
743 2008;295(1):H256-65. Epub 2008/05/20. doi: 10.1152/ajpheart.91489.2007. PubMed PMID: 18487439;  
744 PubMed Central PMCID: PMCPMC2494759.
- 745 46. Fesus G, Dubrovskaja G, Gorzelniak K, Kluge R, Huang Y, Luft FC, et al. Adiponectin is a novel  
746 humoral vasodilator. *Cardiovasc Res.* 2007;75(4):719-27. Epub 2007/07/10. doi:  
747 10.1016/j.cardiores.2007.05.025. PubMed PMID: 17617391.
- 748 47. Ketsawatsomkron P, Sigmund CD. Molecular mechanisms regulating vascular tone by  
749 peroxisome proliferator activated receptor gamma. *Curr Opin Nephrol Hypertens.* 2015;24(2):123-30.  
750 Epub 2015/01/15. doi: 10.1097/MNH.000000000000103. PubMed PMID: 25587903; PubMed Central  
751 PMCID: PMCPMC4384504.

752

753

754

755

756

757 **Figure Legends:**

758 **Figure 1.** ACE2 levels and viral load in CoV2, *T. cruzi* and coinfecting hACE2 mice. A) Immunoblot  
759 analysis (upper panel) of ACE2 in the lungs, heart, and adipose tissue (AT) of control and CoV2/*T.cruzi*  
760 and coinfecting male and female mice. Bar graphs (bottom panel, x axis-arbitrary units) of the levels of  
761 ACE2 normalized to GDI. The error bars represent the standard error of the mean. The comparative-fold  
762 change in the expression levels of ACE2 are presented in Table 1A. B) Number of viral copies/ug of  
763 RNA in the lungs, and hearts, and AT quantitated by qPCR in male and female CoV2 and coinfecting  
764 mice. The error bars represented the standard error of the mean (\*\*  $p \leq 0.01$  and \*\*\*  $p \leq 0.001$ ). (M-  
765 male; F-female).

766 **Figure 2.** CoV2, *T. cruzi* and coinfection regulate pathology in the lungs differently in male and female  
767 hACE2 mice (n=4 mice/subset). A) Histological analysis of the lungs demonstrated increased lung  
768 pathology (infiltrated immune cells (black arrowhead) and granulomas (red arrows) and decreased  
769 alveolar space in CoV2 and coinfecting mice. The presence of lipid droplets [black line] and fibrosis are  
770 shown in the images (x20 magnification). B) Histological grading of the lung's pathology was carried out  
771 according to experimental groups and classified in terms of degree of infiltration of immune cells,  
772 granulomas and accumulation of lipid droplets. Each class was graded on a six-point scale ranging from 0  
773 to 5+ as discussed in Method section, and presented as a bar graph.

774 **Figure 3.** Immunoblot analysis (upper panel) of markers of : (A) adiponectin (HMW ApN and gAd); (B)  
775 ApN receptors (Adipo R1, R2 and T-cadherin; (C) lipid metabolism (PPAR $\alpha$  and PPAR $\gamma$ ) and energy  
776 sensor (pAMPK) and (D) Immune cells (CD4, CD8 and F4/80) and inflammatory cytokines (TNF, IFN $\gamma$ );  
777 in the lungs of control and infected (CoV2, *T. cruzi* and coinfecting) male (M) and female (F) mice. Bar  
778 graphs (lower panels) of the levels of each protein marker normalized to either GDI or beta-actin for A, B,  
779 C, and D, respectively (x axis-arbitrary units). The error bars represent the standard error of the mean.

780 The comparative-fold change in the expression levels of the above protein markers is presented in Table  
781 1A.

782 **Figure 4.** Immunoblot analysis (upper panel) of markers of: A) adipogenesis (HMW ApN, gAd, PPAR $\gamma$   
783 and FABP4); B) Immune cells (CD4, CD8 and F4/80) and inflammatory cytokines (TNF, IFN $\gamma$ ); and C)  
784 Lipolysis (p-HSL and ATGL), necrosis (BNIP3) and apoptosis (caspase 3 and cleaved caspase3) in the  
785 adipose tissue of control and infected (CoV2, *T. cruzi* and coinfecting) male (M) and female (F) mice. Bar  
786 graphs (lower panels) of the levels of each protein marker normalized to beta-actin for A, B, and C  
787 respectively (x axis-arbitrary units). The error bars represent the standard error of the mean. The  
788 comparative-fold change in the expression levels of the above protein markers is presented in Table 1B.

789 **Figure 5.** Histology of the myocardium of hACE2 mice infected with CoV2/*T. cruzi* and coinfecting mice  
790 (n = 3-4, minimum five images/section were analyzed). (A) H&E staining showed significantly increased  
791 lipid droplets in the capillaries (red arrow) and enlarged cardiomyocyte nucleus (black arrowhead) in the  
792 left ventricles in CoV2 infected mice relative to uninfected mice and in coinfecting mice hearts compared  
793 to the hearts of *T. cruzi* infected mice (20x magnification). (B) Masson-trichrome staining showed  
794 significantly more fibrosis and damage (immune cells – yellow arrows) in the right ventricles (RV) of  
795 infected/coinfecting mice compared to uninfected hACE2 mice (20x magnification). (Additional images  
796 are presented in supplemental Fig. 3).

797 **Figure 6.** Immunoblot analysis (upper panel) of markers of : (A) adiponectin (HMW ApN and gAd); (B)  
798 ApN receptors (Adipo R1, R2 and T-cadherin; (C) lipid metabolism (PPAR $\alpha$  and PPAR $\gamma$ ) and energy  
799 sensor (pAMPK) and (D) mitochondrial markers (Cytochrome C and superoxide dismutase (SOD)),  
800 metabolism (hexokinase 2 and adrenergic receptors), and inflammatory markers (F4/80 and TNF $\alpha$ ) in the  
801 hearts of control and infected (CoV2, *T. cruzi* and coinfecting) male (M) and female (F) mice. Bar graphs  
802 (lower panels) of the levels of each protein marker normalized to either GDI or beta-actin for A, B, C, and  
803 D, respectively (x axis-arbitrary units). The error bars represent the standard error of the mean. The  
804 comparative-fold change in the expression levels of the above protein markers is presented in Table 1C.

805

806 **Supplemental Figures**

807 **Supplemental Figure 1.** Flow chart of experimental design.

808 **Supplemental Figure 2.** Histological images of H&E-stained sections of white adipose tissue (WAT)  
809 showing the alteration in the morphology of adipocytes and adipose tissue in mice infected with CoV2, *T.*  
810 *cruzi* and coinfection.

811 **Supplemental Figure 3.** H&E sections (top panel) and Masson trichrome images (bottom panel) of right  
812 ventricles (RV) of coinfecting male and female mice showing fibrosis (blue and purple), infiltration of  
813 immune cells (yellow arrow), accumulation of lipid droplets (red arrow) and enlarged nucleus (green  
814 arrowhead) (40X magnified).

815 **Supplemental Table 1.** Morphometric analysis of the hearts of CoV2, *T. cruzi* infected and coinfecting  
816 male and female mice. The thickness of the right ventricle wall (RVW), left ventricle wall (LVW) and  
817 intra-septal wall (Septal -W) is measured as mentioned in materials and methods and presented in mm.  
818 The significance difference in the wall thickness calculated by t-test comparing to the sex matched  
819 uninfected mice denoted by “\*” (\*  $p \leq 0.05$ , \*\*  $p \leq 0.01$  and \*\*\*  $p \leq 0.001$ ). The significance difference  
820 in the wall thickness between coinfecting and sex matched *T. cruzi* infected mice denoted by “#” (#  $p \leq$   
821 0.05). (M- male; F-female; Con- control; CoV-CoV2 infected; T.c- *T. cruzi* infected; Coinf-coinfecting)

822

Figure 1

Figure 1A

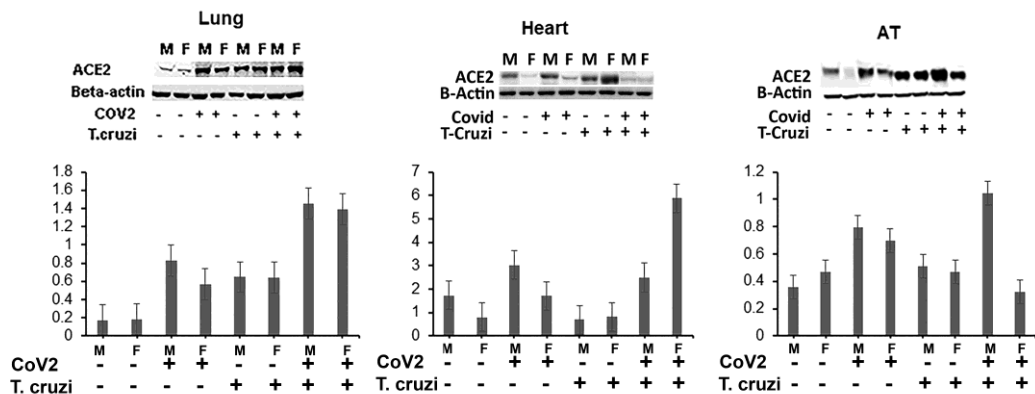

Figure 1B

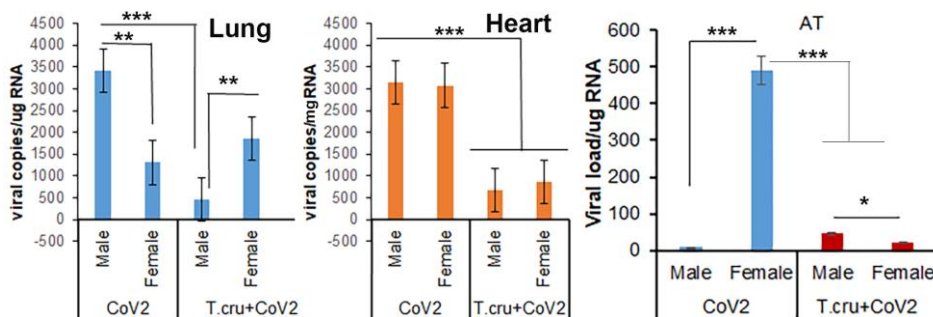

Figure 2 Histological analysis of the lungs

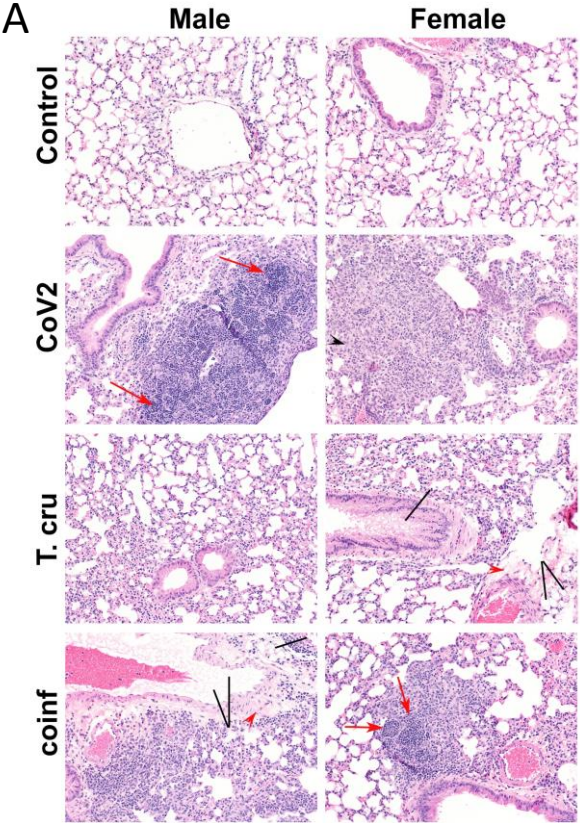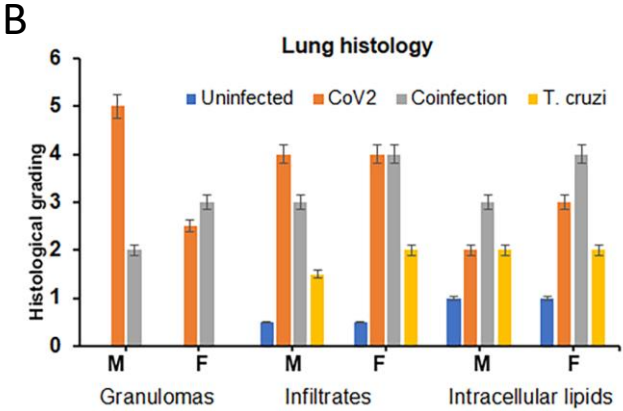

Figure 3

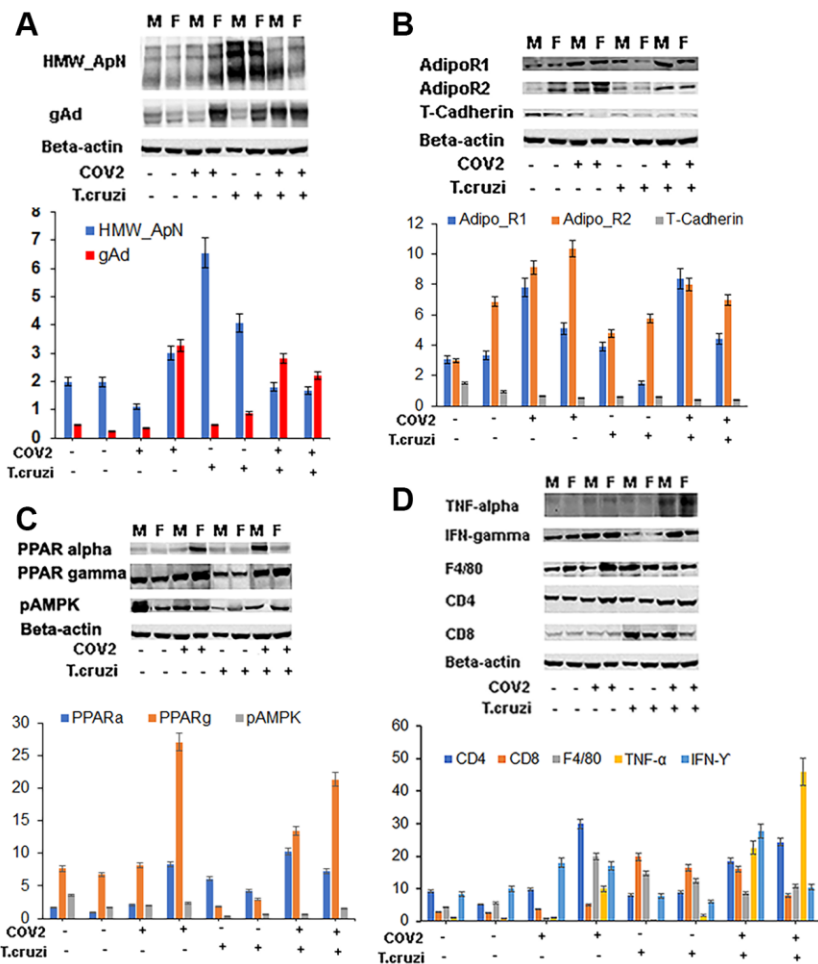

Figure 4

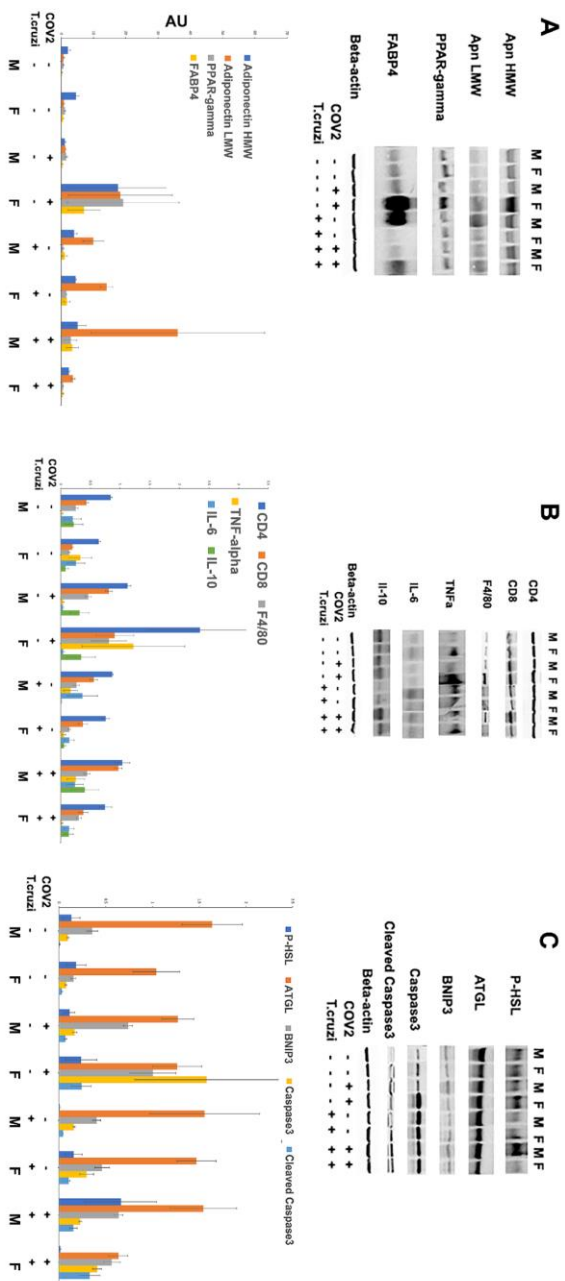



Figure 5 Histological analysis of the Hearts

5A

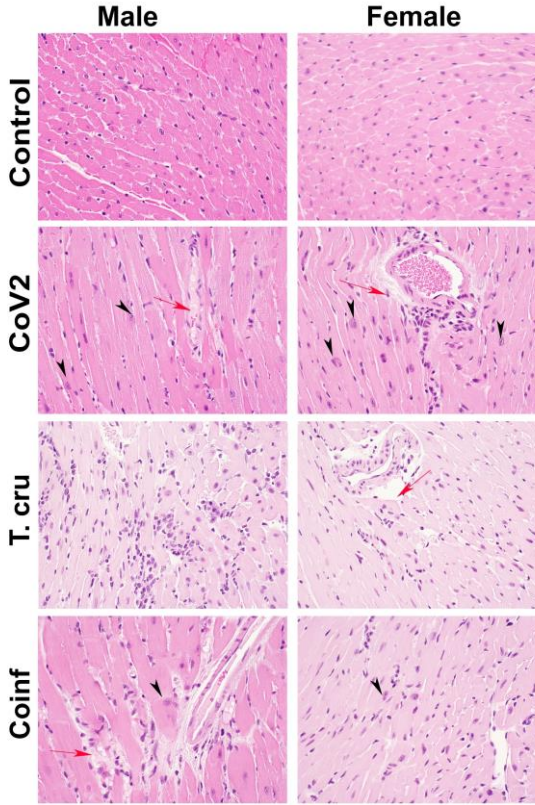

5B

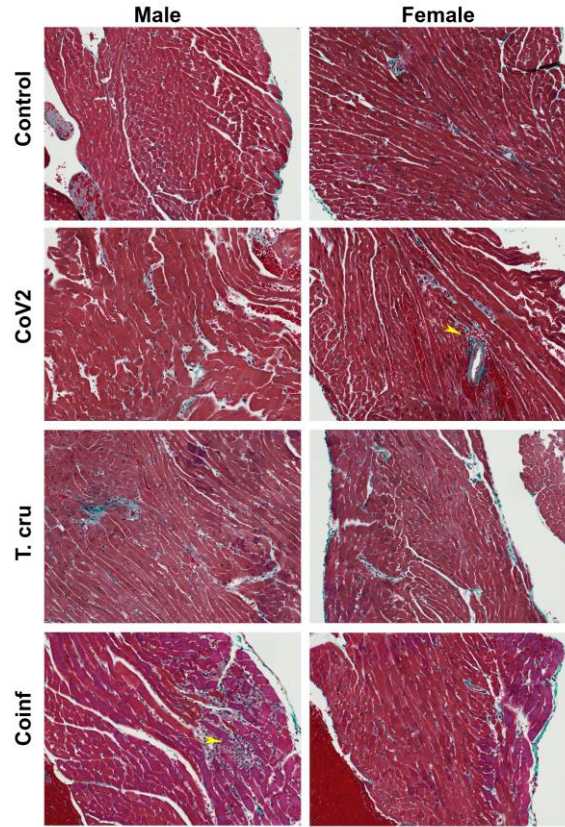

Figure 6

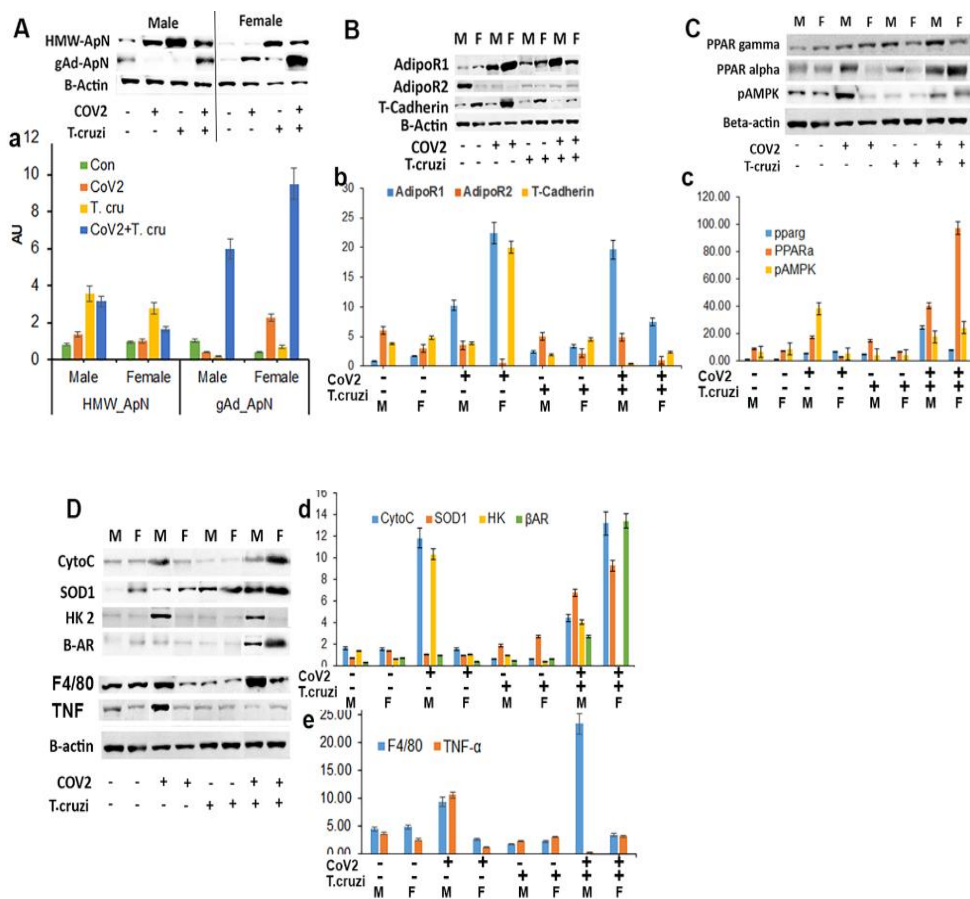

Source: https://www.biorxiv.org/content/10.1101/2021.09.18.460895v1.full.pdf
